1 **DDX50 is a viral restriction factor that enhances TRIF-dependent IRF3 activation**

2

3 Mitchell A. Pallett<sup>1,#a</sup>, Yongxu Lu<sup>1</sup> and Geoffrey L. Smith<sup>1\*</sup>

4

5 <sup>1</sup>Department of Pathology, University of Cambridge, Tennis Court Road, Cambridge, CB2

6 1QP United Kingdom

7 <sup>#a</sup>Department of Infectious Disease, MRC Centre for Molecular Bacteriology and Infection,

8 Imperial College London, SW7 2AZ, UK

9

10 \* Corresponding Author

11 Email: [gls37@cam.ac.uk](mailto:gls37@cam.ac.uk)

## 12 **Abstract**

13 The transcription factors IRF3 and NF- $\kappa$ B are crucial in innate immune signalling in response  
14 to many viral and bacterial pathogens. However, mechanisms leading to their activation  
15 remain incompletely understood. Canonical RLR signalling and detection of viral RNA is  
16 dependent upon the receptors RIG-I, MDA5 and TLR3. Alternatively, the DExD-Box RNA  
17 helicases DDX1-DDX21-DHX36 activate IRF3/NF- $\kappa$ B in a TRIF-dependent manner  
18 independent of RIG-I, MDA5 or TLR3. Here we describe DDX50, which shares 55.6% amino  
19 acid identity with DDX21, as a component of the dsRNA sensing machinery and signalling  
20 pathway. Deletion of DDX50 in mouse and human cells impaired activation of the IFN $\beta$   
21 promoter, IRF3-dependent endogenous gene expression and cytokine/chemokine  
22 production in response to cytoplasmic dsRNA (polyIC transfection), and infection by RNA  
23 and DNA viruses. Mechanistically, DDX50 co-immunoprecipitated with TRIF and DDX1,  
24 promoting complex formation upon stimulation. Furthermore, whilst MAVs/TBK1 induced  
25 signalling is intact in *Ddx50* KO cells, TRIF-dependent signalling was impaired suggesting  
26 DDX50 drives TRIF-dependent *Ifn $\beta$*  transcription. Importantly, loss of DDX50 resulted in  
27 increased replication and dissemination of vaccinia virus, herpes simplex virus and Zika  
28 virus highlighting its important role as a viral restriction factor.

## 29 **Author summary**

30 The detection of viral RNA or DNA by host RNA or DNA sensors and the subsequent  
31 antiviral immune response are crucial for the outcome of infection and host survival in  
32 response to a multitude of viral pathogens. Detection of viral RNA or DNA culminates in the  
33 upregulation of inflammatory cytokines, chemokines and pathogen restriction factors that  
34 augment the host innate immune response, restrict viral replication and clear infection. The  
35 canonical RNA sensor RIG-I is a member of the large family of DExD/H-box helicases,  
36 however the biological role of many DExD/H-box helicases remain unknown. In this report,  
37 we describe the DExD-Box helicase DDX50 as a new component of the RNA sensing  
38 machinery. In response to DNA and RNA virus infection, DDX50 functions to enhance  
39 activation of the transcription factor IRF3, which enhances antiviral signalling. The biological  
40 importance of DDX50 is illustrated by its ability to restrict the establishment of viral infection  
41 and to diminish the yields of vaccinia virus, herpes simplex virus and Zika virus. These  
42 findings increase knowledge of the poorly characterised host protein DDX50 and add  
43 another factor to the intricate network of proteins involved in regulating antiviral signalling in  
44 response to infection.

## 45 Introduction

46 Interferon regulatory factor 3 (IRF3)-dependent signalling leading to type I interferon (IFN)  
47 expression is crucial for pathogen clearance and host survival in response to infection by  
48 many viral and bacterial pathogens (1,2). IRF3 signalling is tightly regulated and is triggered  
49 by intracellular cytoplasmic/endoplasmic detection of viral RNA (dsRNA/5'-ppp/pp-RNA) (3)  
50 and DNA by pattern recognition receptors (PRRs) (4). The retinoic acid-inducible gene I  
51 (RIG-I)-like receptors (RLRs), which include DDX58 (RIG-I), DDX21, DDX1, DHX36, DDX60,  
52 DDX3, DHX9, DHX33, MDA5, and LPG2, as well as Toll-like receptor (TLR) -3, bind directly  
53 to, or form complexes with, viral dsRNA or 5'-ppp-RNA to activate downstream kinases and  
54 induce expression of type I IFN (5). RIG-I/MDA5 activation leads to mitochondrial antiviral  
55 signalling protein (MAVS)-dependent autophosphorylation of TANK-binding protein-1  
56 (TBK1). In turn, TBK1 phosphorylates IRF3, leading to its dimerisation and nuclear  
57 translocation. In parallel, the transcription factor nuclear factor kappa-light-chain-enhancer of  
58 activated B cells (NF- $\kappa$ B) is activated in an inhibitor of nuclear factor kappa-B kinase subunit  
59 beta (I $\kappa$ K $\beta$ ) dependent-manner (6). IRF3 and NF- $\kappa$ B trigger co-transcriptional upregulation of  
60 IFNs and inflammatory cytokines and chemokines, including IFN $\beta$  and C-X-C motif  
61 chemokine 10 (CXCL10/IP-10), as well as IRF3-dependent viral restriction factors (7,8). This  
62 establishes the host antiviral innate immune response, restricting viral replication and  
63 clearing infection.

64 The prototypical RLR, RIG-I, comprises a DExD-box ATPase-dependent RNA helicase with  
65 an N-terminal caspase activation and recruitment domain (CARD) and a C-terminal auto-  
66 inhibitory regulatory domain (RD). Briefly, under resting conditions, RIG-I is held in an  
67 autoinhibitory conformation. Upon agonist (5'-ppp/pp-RNA or short dsRNA) binding to the  
68 RD, RIG-I undergoes conformational change, dimerisation and activation (9). Through  
69 interaction with the E3 ligase tripartite-motif containing protein 25 (TRIM25) and subsequent  
70 K63-linked ubiquitylation of RIG-I, signalling is transduced via complex formation with the  
71 adaptor MAVS (10). Similarly, MDA5 signalling converges at MAVS activation, but differs

72 from RIG-I receptor signalling due to alterations in ligand specificity. Alternatively, TLR3  
73 differs in cellular compartmentalisation/localisation and signals in a TIR domain-containing  
74 adapter molecule 1 (TICAM-1 or TRIF) and TBK-dependent manner independent of MAVS.  
75 MDA5 recognises high molecular weight dsRNA (11) or mRNA lacking 2'-O-methylation at  
76 the 5' cap (12), whereas TLR3 detects dsRNA in the endosomal or extracellular  
77 compartments. These subtle differences mean that during infection numerous RLRs and  
78 RNA sensors are activated in parallel or independent of one another and this is dependent  
79 upon cell type, the pathogen and/or the specific ligands present.

80 Other DExD-Box RNA helicase family members play an essential role in IRF3 signalling in  
81 response to viral PAMPs, including DDX60 (13,14), DDX1, DHX36, DDX21 (15), DHX33  
82 (16) and DDX41 (17). Miyashita and colleagues identified DDX60 as a component of RLR-  
83 dependent signalling, acting through RIG-I and MDA5 to trigger optimal IRF3-dependent  
84 gene expression (13,14). However, a role for DDX60 in RLR signalling is contentious and  
85 recently it was reported to be dispensable for IFN production in response to several RLR  
86 agonists (18). Additionally, DDX1, DHX36 and DDX21 form a cytoplasmic complex with  
87 TRIF upon detection of 5'-ppp-RNA or dsRNA (PolyIC). Upon complex formation, DDX1 and  
88 DHX36 interaction, and TRIF recruitment, are DDX21-dependent, whereas DDX1 acts as  
89 the complex RNA sensor. Interestingly, this complex acts independently of TLR3, RIG-I and  
90 MDA5 in mouse dendritic cells (DCs) and mouse embryonic fibroblasts (MEFs) (15).

91 A recent RNAi screen, implicated the relatively uncharacterised DExD-Box RNA helicase  
92 proteins DDX17 and DDX50 as putative positive regulators of IFN $\beta$  promoter activity in  
93 response to cytoplasmic 5'-ppp-RNA (19). DDX50 is a paralogue of DDX21 sharing 55.6 %  
94 amino acid identity (20). DDX21 (Gu $\alpha$ ; nucleolar protein 2) and DDX50 (Gu $\beta$ ; nucleolar  
95 protein 1) are the only members of the Gu family of nucleolar RNA helicases and contain a  
96 highly homologous GUCT (Gu C-terminal) domain, which is followed by an arginine-serine-  
97 rich C-terminal tail in DDX50 (21). DDX50, as the name suggests, is localised to the nucleoli  
98 and *in vitro* assays have demonstrated that both DDX21 and DDX50 have ATPase and

99 helicase activity, however DDX50 lacks RNA folding activity (21). Although DDX21 and  
100 DDX50 may have arisen by gene duplication on chromosome 10, these proteins have non-  
101 redundant roles. DDX21 targets RNA substrates with a 21- or 34-nt duplex and 5'-  
102 overhangs, whereas DDX50 targets only 21-nt duplex RNA for unwinding (21). On the other  
103 hand, DDX50 is required for optimal DDX21 unwinding activity, suggesting some co-  
104 dependence (21). Little is known about the biological function of DDX50, with one study  
105 suggesting it may be involved in MAP-kinase signalling through interaction with c-Jun (22).

106 By using CRISPR technology to knockout *Ddx50* in MEFs and *DDX50* in human embryonic  
107 kidney 293T cells (HEK293Ts), DDX50 was identified as a restriction factor for the DNA  
108 viruses vaccinia virus (VACV) and herpes simplex virus type 1 (HSV-1) and the RNA virus  
109 Zika (ZIKV). Mechanistically, DDX50 enhances IRF3-dependent gene transcription and  
110 cytokine synthesis and secretion in response to cytoplasmic dsRNA, and RNA or DNA virus  
111 infection.

## 112 **Results**

### 113 **DDX50 is a novel factor required for nucleic acid sensing**

114 To investigate the putative role of DDX50 in cytoplasmic RNA sensing, CRISPR-mediated  
115 knockouts (KO) were generated in MEFs and HEK293Ts. Successful KO was confirmed by  
116 immunoblotting (Fig. S1B and E) and genomic sequencing of individual alleles (Fig. S1A, C,  
117 D, F). Sequencing indicated frameshifts in exon 1 (Fig. S1C) and exon 4 (Fig. S1F)  
118 producing nonsense mutations and introduction of an early stop codon. No differences in  
119 morphology or growth properties between the wild type (WT) and KO cells were observed  
120 (data not shown). Initially, the contribution of DDX50 to IRF3 signalling in response to RLR  
121 agonists was investigated. Cells were co-transfected with a Firefly Luciferase reporter  
122 plasmid under the control of the IFN $\beta$  promoter (pIFN $\beta$ -Luc) and an internal control plasmid  
123 constitutively expressing Renilla Luciferase (pTK-RL). These cells were further mock-  
124 transfected or transfected with PolyIC (dsRNA analogue), infected with an RNA virus  
125 (Sendai virus (SeV)) or treated with extracellular PolyIC. IFN $\beta$  promoter activity was then  
126 measured relative to Renilla luminescence and non-stimulated controls. Promoter activity  
127 was significantly diminished in KO cells in comparison to WT cells in response to all stimuli  
128 (Fig. 1A), validating the results observed in the initial RNAi screen (19). Consistent with this  
129 observation, knockout of *Ddx50* reduced the expression of endogenous NF- $\kappa$ B and/or IRF3-  
130 dependent genes (*Isg56*, *Cxcl10* and *Ifnb*) in response to PolyIC and SeV as measured by  
131 RT-qPCR (Fig. 1B) and ELISA (CXCL10 and IL-6; Fig. 1C-D). Collectively, this indicates that  
132 DDX50 affects both the IRF3 or IRF3 and NF- $\kappa$ B branch of signalling in response to  
133 cytoplasmic dsRNA. Importantly, the defect in NF- $\kappa$ B/IRF3-dependent gene expression in  
134 response to PolyIC was rescued by transduction and complementation of *Ddx50* KO cells  
135 with a lentiviral vector encoding *Ddx50* (Fig. 2A-C). This ruled out CRISPR off target effects  
136 for the observed defect. Furthermore, overexpression of DDX50 augmented IFN $\beta$  promoter  
137 activity (Fig. S2A-B) and secretion of CXCL10 and IL-6 in response to PolyIC transfection  
138 (Fig. S2C-D). Interestingly, overexpression of DDX50 alone induced secretion of CXCL10

139 (Fig. S2C), indicating pathway activation above basal level even in the absence of  
140 stimulation. Concomitant experiments in HEK293T *DDX50* KO lines confirmed a  
141 dependence on DDX50 for optimal pathway activation in response to SeV infection in a  
142 human cell line (Fig. 1E-F).

#### 143 **DDX50 is required for IRF3/NF- $\kappa$ B driven gene expression during DNA virus infection**

144 To investigate the biological relevance of DDX50, WT or KO MEFs were infected with two  
145 large dsDNA viruses, VACV and HSV-1. The modified vaccinia Ankara (MVA) strain and the  
146 HSV-1  $\Delta$ ICPO strain each elicit strong innate immune responses in tissue culture and were  
147 therefore used to increase pathway activation and sensitivity, as described previously  
148 (23,24). Following infection with either MVA or HSV-1  $\Delta$ ICP0, the expression of IRF3 and/or  
149 NF- $\kappa$ B-dependent *Isg56* and *Ifnb* were significantly diminished in the KO cells in comparison  
150 to infected WT cells (Fig. 3A-B). This correlated with decreased secretion of CXCL10 and IL-  
151 6 as determined by ELISA (Fig. 3C-D). Although significant, the effect of *Ddx50* KO on  
152 *Cxcl10* expression by RT-qPCR following infection with both viruses was less pronounced  
153 (Fig. 3A-B). Overall, this highlights the importance of DDX50 in innate immune signalling  
154 during viral infection.

#### 155 **Loss of *Ddx50* does not alter IL-1 $\alpha$ or TNF $\alpha$ -mediated NF- $\kappa$ B activation**

156 Deletion of *Ddx50* impaired the induction of NF- $\kappa$ B/IRF3-co-transcribed genes in response to  
157 dsRNA transfection, ssRNA virus infection (Fig. 1) and dsDNA virus infection (Fig. 2) and  
158 previously was reported to modulate MAP kinase signalling (22). Therefore, alternative  
159 pathways were tested to determine if the observed defect was specific to RLR signalling. WT  
160 or KO MEFs were treated with IL-1 $\alpha$  or TNF $\alpha$  and activation of the NF- $\kappa$ B promoter or  
161 expression of *Il-6* and *Nfkb1a* were measured by Luciferase reporter gene assay or RT-  
162 qPCR, respectively. No differences in NF- $\kappa$ B promoter activity or NF- $\kappa$ B-dependent gene  
163 expression were observed (Fig. 4A-C), indicating that DDX50 does not play a role in  
164 canonical IL-1 receptor- or TNF receptor-induced NF- $\kappa$ B signalling. Collectively, these data



165 suggest DDX50 acts at the stage of IRF3 activation specifically or at or upstream of MAVS  
166 and/or TRIF activation before the RNA sensing pathways diverge to activate IRF3 and NF-  
167  $\kappa$ B.

### 168 **DDX50 accumulates in the cytoplasm to activate signalling upstream to MAVS**

169 To investigate where DDX50 acts in the pathway and determine how it facilitates activation  
170 of IRF3/NF- $\kappa$ B in response to dsRNA, the phosphorylation of IRF3 was examined. This is a  
171 key step in IRF3-dependent signalling and leads to IRF3 dimerisation, nuclear translocation  
172 and IRF3-dependent gene transcription. Interestingly, DDX50 was observed to be important  
173 for IRF3 phosphorylation at Ser386/396 following PolyIC transfection of both MEFs and  
174 HEK293Ts (Fig. 5A-B), mapping DDX50 function to upstream of IRF3 phosphorylation.  
175 DDX50 is reported to reside in the nucleolus. However, to act upstream of IRF3  
176 phosphorylation in the canonical cascade one would expect DDX50 to be cytosolic. To  
177 explore this further biochemical fractionation of MEFs and anti-DDX50 immunoblotting with  
178 or without prior pathway stimulation was used to assess the subcellular localisation of  
179 DDX50 in response to cytoplasmic dsRNA. LaminA/C and  $\alpha$ -tubulin served as nuclear and  
180 cytoplasmic fraction controls, respectively. As described, under resting conditions, the  
181 majority of DDX50 was in the nuclear fraction (21) (Fig. 5C). However, DDX50 accumulated  
182 in the cytoplasm 1 h post-stimulation (Fig. 5C). At 2 h post-stimulation the level of DDX50 in  
183 the cytoplasm returned to basal levels (Fig. 5C). To support this finding the assay was  
184 repeated and the localisation of HA-tagged DDX50 was analysed by immunofluorescence.  
185 Under resting conditions DDX50 was restricted to the nucleolus, with weak nuclear staining.  
186 In agreement with the biochemical fractionation assay, accumulation of DDX50 in distinct  
187 cytoplasmic puncta was observed 1 h post infection with SeV (Fig. 5D).

188 The nucleocytoplasmic shuttling of DDX50 upon stimulation led us to investigate at which  
189 stage in the activation of the IRF3/NF- $\kappa$ B pathway DDX50 might function. The IRF3/NF- $\kappa$ B  
190 pathway can be activated by transfection and overexpression of key proteins acting at

191 specific stages of the pathway. Therefore, to map in more detail where DDX50 acts,  
192 plasmids encoding TBK1, MAVS or TRIF were co-transfected into WT or KO MEFs along  
193 with pLuc-IFN $\beta$  and pTK-RL. Activation of the pathway was measured by Firefly and Renilla  
194 Luciferase activation as before. No differences in fold activation were observed between the  
195 WT and KO cells upon expression of TBK1 or MAVS (Fig. 5E). However, activation was  
196 significantly impaired in the KO cell line upon expression of TRIF, mapping DDX50 upstream  
197 to or independent of MAVS, but at or downstream of TRIF activation. Notably, DDX50  
198 shares 55.6 % amino acid identity with DDX21, which is essential for TRIF recruitment to  
199 MAVS via complex formation with DDX1 and DHX36 in response to cytoplasmic dsRNA  
200 (15).

### 201 **DDX50 augments TRIF recruitment to activate signal transduction**

202 An essential TRIF-binding domain of DDX21 has been mapped to residues 467-487 within  
203 the RNA helicase C domain (15). Strikingly, this motif shares 86% amino acid identity with  
204 DDX50 (Fig. 6A). This level of homology was specific for DDX50 and not due to the helicase  
205 C domain consensus sequence, because it was not detected within other DExD-box family  
206 members such as DHX36 (Fig. 6A). Due to the high level of identity between DDX21 and  
207 DDX50 we investigated whether DDX50 can co-immunoprecipitate the DDX1-DDX21-  
208 DHX36-TRIF complex. To this end, co-immunoprecipitation assays were performed using  
209 extracts of MEF cell lines that stably expressed DDX50-HA and that were transfected with  
210 TRIF-cTAP or GFP-Flag. Following stimulation, DDX50-HA specifically co-  
211 immunoprecipitated TRIF-cTAP (Fig. 6B). This was confirmed by reciprocal  
212 immunoprecipitation in HeLa cells, where hDDX50-HA specifically co-immunoprecipitated  
213 with TRIF-cTAP (Fig. 6C). Due to the quality of available anti-TRIF antibodies, co-  
214 immunoprecipitation of endogenous TRIF could not be tested. However, endogenous DDX1  
215 did co-immunoprecipitate with DDX50-HA, albeit at low levels (Fig. 6D). This led to the  
216 hypothesis that DDX50 may form a cytoplasmic RNA sensing complex with TRIF, to activate  
217 TRIF-dependent NF- $\kappa$ B and IRF3 activation. To test this hypothesis, the ability of TRIF to

218 form a complex with DDX1 in WT or DDX50 KO cells was investigated. Interestingly, in the  
219 absence of DDX50 the co-immunoprecipitation of endogenous DDX1 with TRIF was  
220 diminished, indicating DDX50 may facilitate optimal TRIF recruitment to the RIG-I/MDA5  
221 independent RNA sensing complex (Fig. 6E).

## 222 **DDX50 is a viral restriction factor**

223 IRF3 is a crucial viral restriction factor that controls the transcriptional upregulation of  
224 cytokines, chemokines, viral restriction factors and type I IFNs and thereafter IFN-stimulated  
225 genes (ISGs) downstream of IFN-induced signalling. Given the role of DDX50 in IRF3/NF-  
226  $\kappa$ B-dependent type I IFN production and the synthesis of cytokines during viral infection, its  
227 potential as a viral restriction factor was investigated. WT and DDX50 KO cells were infected  
228 at either high MOI or low MOI with the dsDNA viruses VACV (MEF, MOI 5 or 0.0001;  
229 HEK293T, MOI 5 or 0.0003) and HSV-1 (MOI 0.01) or ZIKV (MOI 1 or 0.1), a ssRNA virus,  
230 and virus replication and dissemination were analysed by virus titration and plaque  
231 formation. VACV infection produces both single enveloped intracellular mature virus (IMV)  
232 and double enveloped cell associate enveloped virus (CEV) and extracellular enveloped  
233 virus (EEV) (25). CEVs induce the formation of actin tails to propel virions towards  
234 uninfected neighbouring cells. Alternatively, EEVs are released from infected cells and  
235 mediate long range dissemination (26). To investigate if loss of *Ddx50* alters viral replication  
236 or release, VACV strain Western Reserve (WR) encoding GFP fused to the virus capsid  
237 protein A5 (A5-GFP VACV) was used to infect WT or KO MEFs/HEK293Ts at MOI 5 and the  
238 total virus or extracellular virus titres 24 h p.i. were determined by plaque assay. No  
239 differences in titres of cell associated virus (IMV plus CEV) or released virus (EEV) were  
240 observed (Fig. 7A-B) and equal amounts of EEV were produced (approximately 2 % of the  
241 total titre; Fig. 7A). Next, virus dissemination and replication were assessed at low MOI.  
242 Monolayers of WT or KO MEFs/HEK293Ts were infected at MOI 0.0001 or 0.0003 with A5-  
243 GFP-VACV or at MOI 0.01 with HSV-1 strain 17 (S17) encoding GFP fused to Vp26 (Vp26-  
244 GFP) and viral titres were determined. Loss of DDX50 in MEFs and HEKs conferred an

245 approximate 6- and 3.5-fold increase in the yield of VACV at 24 and 48 h p.i., respectively  
246 (Fig. 8A-B). This difference was not restricted to VACV, and loss of DDX50 resulted in an  
247 increase in yield of HSV-1 following low MOI (Fig. 8C). In line with higher viral titres,  
248 synthesis of the VACV specific late gene product D8 was enhanced in KO MEFs (Fig. 8F).  
249 Notably, the number of plaques formed by VACV was increased on the KO MEFs and  
250 HEK293Ts compared to control cells (Fig. 8E and G; Supp Fig. S3A). This suggests that  
251 DDX50 restricts plaque formation when cells are infected at low MOI and without DDX50 a  
252 greater proportion of virus particles entering cells escape host defences and establish a  
253 plaque. Consistent with this observation, complementation of KO MEFs with pCW57-*Ddx50*-  
254 HA but not the empty vector (EV) reduced viral yields and plaque formation efficiency to WT  
255 levels (Fig. 8G-H). Furthermore, overexpression of hDDX50-HA but not hDDX28-HA in WT  
256 human fibroblasts restricted VACV, resulting in significantly lower viral titres (Fig. S3B).

257 Given that the activation of IRF3 restricts RNA virus infection as well, a ZIKV replication  
258 assay was performed in the absence of DDX50. Parental HEK293T and derived DDX50-/-  
259 cells were infected with ZIKV at MOI 1 or 0.1. Three days p.i., supernatants of infected cells  
260 were collected and infectious virus was titrated by plaque assay on Vero E6 cells. The  
261 absence of DDX50 increased ZIKV replication following low MOI (Fig. 8D), however in  
262 concordance with dsDNA viral infection, no difference was observed at high MOI (Fig. 7C).  
263 This suggests that the role of DDX50 in promoting activation of the IRF3 pathway contributes  
264 to the restriction on ZIKV infection. Together, these results provide evidence that DDX50  
265 promotes antiviral signalling during infection and is a restriction factor for both DNA and RNA  
266 viruses, with its loss resulting in increased viral spread and subsequent replication in tissue  
267 culture.

## 268 Discussion

269 Type I IFNs are critical regulators of antiviral immunity and infection control and therefore,  
270 understanding the mechanisms leading to their production during infection is important.  
271 During the last decade, much research has studied the canonical RLRs and RNA sensors  
272 RIG-I, MDA5 and TLR3, and has investigated their activation, expression and mechanisms  
273 of regulation in response to RLR agonists and infection. Zhang and colleagues described a  
274 TLR3, RIG-I and MDA5-independent pathway in mouse dendritic cells in which cytoplasmic  
275 RNA was sensed by a complex consisting of DDX1-DDX21-DHX36, leading to recruitment of  
276 TRIF (15). Here, DDX50 is described as a new component of the RNA sensing signalling  
277 pathway. DDX50 is a TRIF-binding RNA helicase that is an integral member of TRIF-  
278 dependent IRF3/NF- $\kappa$ B activation in fibroblast/epithelial cells. Aside from the initial *in vitro*  
279 characterisation of the RNA helicase functional domains of DDX50, little is understood about  
280 its cellular role. A previous study concluded that DDX50 is required for MAP kinase  
281 activation through c-Jun binding (22). However, whilst a defect in RNA sensing and  
282 signalling was observed here, no differences in TNFR/IL-1R-dependent NF- $\kappa$ B signalling  
283 were detected. Differences in the signalling cascade that were observed are independent of  
284 MAP kinase and activator protein 1 (AP-1) activation, indicating that this is an independent  
285 role for DDX50.

286 DDX50 is needed for optimal IRF3/NF- $\kappa$ B-dependent gene expression, and cytokine  
287 synthesis and secretion following stimulation with dsRNA analogue PolyIC, SeV infection or  
288 infection with the dsDNA viruses HSV-1 and VACV. Further investigation found that without  
289 DDX50, IRF3 phosphorylation was impaired downstream of these stimuli, but that signalling  
290 was intact following activation via MAVS overexpression. This mapped the activity of  
291 DDX50, a nucleolar protein, to early in the signalling cascade upstream or independent of  
292 MAVS activation. DDX50 shuttling and cytoplasmic accumulation in distinct puncta upon  
293 stimulation is reminiscent of DDX1/TRIF staining in response to PolyIC treatment and is  
294 consistent with a role for DDX50 in cytoplasmic regulation of IRF3 signalling (15). The RNA

295 sensing complex consisting of DDX1, DHX36 and DDX21 identified by Zhang and  
296 colleagues did not report on DDX50. However, this was performed in mouse dendritic cells  
297 and the expression of DDX50 varies from cell type to cell type (human atlas data). It may be  
298 that DDX50 plays a more significant role in non-haematopoietic cells or that it was below  
299 detection in the initial screen. Alternatively, the high sequence identity between DDX50 and  
300 DDX21 may have masked the role of DDX50 following knockdown of DDX21. In the DDX1-  
301 DHX36-DDX21 complex, DDX21 acts as a scaffold to recruit TRIF upon DDX1 agonist  
302 binding. Therefore, we hypothesise that DDX50 may act in a similar fashion. Notably, whilst  
303 DDX21 and DDX50 have non-redundant roles, DDX50 is essential for DDX21 helicase  
304 activity *in vitro* (21). So, it is possible that DDX50 may function to support DDX21 or even  
305 DDX1 (the RNA binding protein) activity in this complex, which may explain why DDX50 is  
306 not functionally redundant. Whilst diminished binding of TRIF and DDX1 was observed in the  
307 absence of DDX50, it was not abolished, and the role of the functional domains of DDX50,  
308 DDX21 and DDX1 in RNA sensing warrants future experimentation.

309 Consistent with a role for DDX50 in innate immune signalling, DDX50 is shown to be a viral  
310 restriction factor. Loss of DDX50 resulted in an attenuated immune response to infection  
311 with VACV or HSV-1 and enhanced replication of VACV, ZIKV and HSV-1 in tissue culture  
312 after low MOI infection. Notably, a greater number of VACV plaques were formed on KO cell  
313 lines suggesting that DDX50 acts to restrict viral infection and in its absence a greater  
314 proportion of infecting virus particles escape host defences and lead to plaque formation. At  
315 high MOI, there were no differences in virus yield suggesting that infection of a single cell by  
316 many incoming virus particles can overcome DDX50-mediated restriction. This is  
317 reminiscent of cellular restriction factors involved in innate immune signalling. These data  
318 provide evidence of the biological relevance of DDX50 for antiviral signalling during infection.  
319 Interestingly, DDX50 is reported to co-immunoprecipitate with the positive sense RNA virus  
320 Dengue (DENV) RNA (27) and recent publications using siRNA to knockdown DDX50,  
321 suggest that it may inhibit DENV replication (28). Following knockdown, the authors reported

322 a reduction in IFN $\beta$  promoter activity and therefore hypothesised that DDX50 may regulate  
323 type I IFN production during DENV infection (29). This is consistent with our findings that the  
324 ZIKV titre is increased in the absence of DDX50, and together provides evidence that  
325 DDX50 is a viral restriction factor in response to multiple RNA and DNA viruses. Therefore,  
326 DDX50 as a restriction factor may extend beyond the viruses tested in this study and act  
327 broadly to detect viral RNA and restrict viral replication through activation of IRF3-dependent  
328 gene transcription.

329 Although DDX50 was required for optimal signal transduction its absence did not abolish  
330 signalling in response to viral infection or stimulation. Given that DDX50 binds TRIF, a  
331 protein that is non-essential for RIG-I/MDA5 signalling, and that DDX1 acts independent of  
332 canonical RIG-I signalling, we propose that DDX50 acts in concert with other receptors for  
333 optimal antiviral signalling and restriction. Whilst this study identifies a role for DDX50 in  
334 RNA sensing, both HSV-1 and VACV are DNA viruses. HSV-1 is reported to be restricted  
335 mostly by the cGAS-STING pathway (30). However, DNA sensing and antiviral signalling is  
336 positively regulated by both TRIF and RNA sensing during HSV-1 infection (31–33),  
337 highlighting the essential role of RNA sensors during DNA virus infection. Cells infected with  
338 VACV contain large amounts of dsRNA late during infection (34,35). This is due to the virus  
339 intermediate and late genes lacking specific transcriptional termination sequences and so  
340 lengthy overlapping transcripts are produced that hybridise to form dsRNA (36). These  
341 transcripts can be sensed and activate innate immune signalling pathways (37). In addition,  
342 such dsRNA can bind to and activate IFN-induced proteins such as PKR and 2'-5'  
343 oligoadenylate synthetase (OAS) to mediate translational shutoff. The importance of dsRNA  
344 in activating host defences is illustrated by the fact that VACV, despite being a dsDNA virus,  
345 encodes a dsRNA binding protein called E3 (38), that contributes to virulence (39). It is  
346 important to note that TRIF is also an essential component of the STING pathway (31).  
347 Therefore, the level to which DDX50 restricts DNA viruses in an RNA-sensing dependent  
348 manner, or whether it can further influence TRIF signalling in the cGAS-STING pathway,

349 warrants future investigation. Furthermore, the importance of DDX50 in RNA sensing and its  
350 contribution in antiviral immunity requires validation *in vivo*. Unfortunately, to date there are  
351 no KO mice or models available, however with the recent success in generating *Ddx21* KO  
352 mice, it may soon be a plausible avenue for investigation.

353 In conclusion, the DExD-Box RNA helicase DDX50 is identified as a crucial component in  
354 the host cell RNA sensing machinery, acting to facilitate IRF3 activation and inhibit viral  
355 dissemination. It is proposed that DDX50 may act through the recruitment of TRIF to the  
356 DDX1 RNA sensing complex.



357 **Acknowledgements**

358 We would like to thank Dr. B.J. Ferguson, University of Cambridge and Dr. A. Shenoy,  
359 Imperial College London, for their helpful feedback and advice and Dr. Trevor Sweeney,  
360 University of Cambridge for providing ZIKV for this project. pCW57-GFP-2A-MCS was a gift  
361 from Adam Karpf (Addgene plasmid #71783).

## 362 **Material and Methods**

### 363 **Cells, plasmids, reagents and viruses**

364 All reagents were purchased from Sigma unless stated otherwise. BSC-1 (ATCC CCL-26),  
365 U2OS (ATCC HTB-96), HEK293T (ATCC CRL-11268) and immortalised mouse embryonic  
366 fibroblasts (MEF) were all grown in Dulbecco's modified Eagle's medium (DMEM) high  
367 glucose (Gibco), supplemented with 10 % foetal bovine serum (FBS; Pan Biotech), 50 µg/ml  
368 penicillin/streptomycin (P/S), non-essential amino acids (NEAA). HeLa (ATCC CCL-2) and  
369 human fibroblasts (HF) clone EF-1-F (sourced from Doorbar lab, University of Cambridge)  
370 were grown in MEM (Gibco) supplemented with 10 % FBS, 50 µg/ml P/S and non-essential  
371 amino acids (NEAA). All cells were grown at 37 °C in a 5 % CO<sub>2</sub> atmosphere and were  
372 routinely screened for mycoplasma contamination. All plasmids constructed in this study are  
373 listed in Table S1. Vaccinia virus (VACV) strain Western Reserve (WR) recombinant vA5-  
374 GFP (40), modified vaccinia virus Ankara (MVA) (41), HSV-1 S17 GFP-Vp26 (42) and HSV-  
375 1 ΔICPO (43) were described. The titre of infectious viral particles (plaque-forming units per  
376 ml, p.f.u./ml) was determined by plaque assay on BSC-1 cells for VACV WR and on U2OS  
377 for HSV-1. Sendai virus Cantell strain (Licence No. ITIMP17.0612A) was a gift from Steve  
378 Goodbourn, St George's Hospital Medical School, University of London. ZIKV engineered to  
379 express a mCherry marker (44) was a kind gift from Dr. Trevor Sweeney, Department of  
380 Pathology, University of Cambridge.

### 381 **CRISPR-cas9 generation of knockout cell lines**

382 Guide RNA design and synthesis, and pX459 plasmid construction was performed following  
383 the Zhang lab protocol (45). Specific guide RNAs are described in Table S1. To generate  
384 KOs, MEFs were transfected with pX459 plasmids using LT1 following the manufacturer's  
385 protocol. Twenty-four h post transfection MEFs and HEK293Ts were treated with 4 µg/ml  
386 and 1 µg/ml puromycin (Invitrogen) for 48 h, respectively. Single cell clones were selected  
387 by limiting dilution, expanded, and screened for DDX50 protein levels by immunoblot. To

388 confirm successful knockouts, the genomic DNA of selected clones was purified following  
389 the manufacturer's protocol (Qiagen, QIAamp DNA mini kit). *Ddx50* was amplified using the  
390 primer pair gagcgtccttctctggagattg / ctcaagtctgcccattctctcg and *DDX50* was amplified using  
391 the primer pair ctgtgtcaccaggtggcatg / gactcgtgtaactttcttccc. Single allele PCR amplicons  
392 were then cloned into pCR2.1-TOPO by blunt end ligation (Thermofisher) and 10 clones  
393 were sequenced for each KO cell line clone. Single allele sequencing results were compared  
394 to the sequence results of the gDNA PCR amplicon to check all alleles had been identified  
395 and that all mutations resulted in frameshift truncations.

396

#### 397 **pLDT and pCW57 cell line generation**

398 WT and *Ddx50*<sup>-/-</sup> MEF and WT HF cell lines inducibly overexpressing DDX50 were obtained  
399 by transduction using lentivirus vectors. pLDT and pCW57 cell lines were generated as  
400 described (46) with the following alterations. MEFs and HFs were selected in 4 µg/ml  
401 puromycin (Invitrogen), followed by single cell selection. For HF pLDT-TetR-GFP was co-  
402 packaged along with the pLDT-MCS plasmids and selected for with 500 µg/ml neomycin  
403 (Gibco).

#### 404 **Luciferase reporter assay**

405 HEK293T, HF and MEF cell lines were transfected with 10 ng of the internal control plasmid  
406 pTK-Renilla (pRL-TK, Promega) or 60 ng of the reporter plasmid pLUC-NF-κB (R.  
407 Hofmeister, University of Regensburg, Germany) or pLUC-IFNβ (T. Taniguchi, University of  
408 Tokyo) using LT1 transfection reagent and following the manufacturer's instructions  
409 (MirusBio Ltd). Where stated, plasmids encoding TRIF, MAVS or TBK-1 (K.A. Fitzgerald,  
410 University of Massachusetts Medical School) were co-transfected. Twenty-four h post-  
411 transfection, cells were stimulated with IL-1α (Invivogen) or TNFα (Invivogen) at 100 ng/ml or  
412 transfected with 5 µg/ml high molecular weight (HMW) PolyIC (Invivogen) using  
413 Liopfectamine 2000 (Invitrogen), or mock-transfected with lipofectamine only, or treated  
414 exogenously with 5 µg/ml PolyIC, or left unstimulated for 6 h in DMEM or MEM with 2 %

415 FBS. Alternatively, cells were stimulated by SeV infection at 1:100 dilution of stock for 24 h.  
416 Following stimulation cells were lysed in 1 x Passive lysis buffer (Promega) and Firefly  
417 luciferase and Renilla luminescence were measured using the MARS data analysis software  
418 on the FLUOstar Omega Luminometer (BMG Labtech). Relative luminescence levels were  
419 calculated by normalising Firefly luminescence to Renilla and data are presented as relative  
420 to the non-stimulated untreated condition, or EV where relevant, for each cell line. Each  
421 condition was performed with quadruplicate technical replicates and is representative of two  
422 biological repeats.

### 423 **ELISAs and RT-qPCR**

424 MEFs were seeded in DMEM with 2 % FBS and HEK293Ts were seeded in DMEM with 10  
425 % FBS. After 18 h cells were mock-transfected or transfected with 5 µg/ml HMW PolyIC  
426 (Invivogen) using Lipofectamine 2000 (Thermofisher) for 7 h or infected with SeV (Cantell  
427 Strain) for 4.5 or 24 h where stated. The culture medium was cleared by centrifugation at 17,  
428 000 x g and stored at -20 °C before analysis by ELISA. The level of human or mouse  
429 CXCL10/IP-10 was determined using a DuoSet ELISA kit (R&D Systems) and the level of  
430 mouse IL-6 was determined using a DuoSet ELISA kit (R&D systems) following the  
431 manufacturer's instructions. Data were collected and analysed using the MARS data  
432 analysis software on the FLUOstar Omega Luminometer (BMG Labtech). Experiments were  
433 carried out in triplicate and measured with technical repeats, unless stated otherwise. RNA  
434 extraction, cDNA synthesis and RT-qPCR were carried out as described previously using  
435 first strand synthesis (Invitrogen) (47). qPCR was performed using the primers indicated in  
436 Table S2.

### 437 **Immunoprecipitations**

438 HeLa cells were transfected with pLDT-hDDX50-HA and co-transfected with pCDNA3-GFP-  
439 Flag or pCDNA3-TRIF-cTAP where stated. For MEFs, DDX50-HA pCW57 cell lines were  
440 induced with 2 µg/ml doxycycline 24 h prior to transfection with pCDNA3-GFP-Flag or

441 pCDNA3-TRIF-cTAP. WT and *DDX50*<sup>-/-</sup> HEK293Ts were transfected with pCDNA3-TRIF-  
442 cTAP. Twenty-four h post transfection cells were stimulated by transfection with 5 µg/ml  
443 PolyIC or infected with SeV (1:200) where stated. Following stimulation, cells were washed  
444 and lysed in 50 mM Tris pH 7.6, 150 mM NaCl, 1 % NP40 (IGEPAL CA-630), 1 mM EDTA,  
445 10 % glycerol and supplemented with protease inhibitor. Proteins were immunoprecipitated  
446 as described (48) with M2 Flag-beads or HA-beads. After the final wash, beads were  
447 incubated in 4 x sample buffer (Tris 0.5 M pH 6.8, 40 % glycerol, 6 % SDS, 1 %  
448 bromophenol blue and 0.8 % β-mercaptoethanol), boiled and analysed by immunoblotting.

#### 449 **Immunoblotting**

450 Samples were prepared by the addition of 4 x sample buffer, boiled and separated by gel  
451 electrophoresis in Tris-glycine SDS (TGS) buffer (20 mM Tris, 192 mM glycine, 1 % (w/v)  
452 SDS) and transferred to a nitrocellulose membrane (GE Healthcare) in Tris glycine (TG)  
453 buffer (20 mM Tris-HCl pH 8.3, 150 mM glycine) using the Turboblot system (BioRAD).  
454 Membranes were blocked in 5 % milk in Tris-buffered saline (10 mM Tris, 150 mM NaCl) pH  
455 7.4 with 0.1% (v/v) Tween-20 (TBS-T) for 1 h before incubating with the primary antibody  
456 overnight at 4 °C. Primary antibodies: rabbit monoclonal anti-Flag (F7425), anti-DDX50  
457 (Abcam; ab109515), anti-IRF3 Ser386 (Abcam, ab76493), rabbit polyclonal anti-HA (H6908),  
458 mouse monoclonal anti-Flag (F1804), anti-α-tubulin (Millipore; 05-829), anti-DDX50 (Santa  
459 cruz, sc-81077), anti-DDX1 (Santa cruz; sc-271438), anti-LaminA/C (Abcam; ab8984),  
460 mouse polyclonal anti-IRF-3 S396 (CST; #4947S) or mouse monoclonal anti-D8 clone AB1.1  
461 (49). Membranes were washed 3 times in TBS-T before incubating with secondary  
462 antibodies for 1 h. Secondary antibodies were goat anti-rabbit IRDye 800CW (926-  
463 68032211; LiCOR) and goat anti-mouse IRDye 680LT (926-68020; LiCOR) or, for  
464 immunoprecipitated samples, biotin-anti-mouse light chain followed by streptavidin IRDye  
465 680LT (926-68031; LiCOR) was used. Finally, membranes were washed 3 times in TBS-T,  
466 dried and imaged using the LiCOR system and Odyssey software. For protein level  
467 comparisons, densitometry was calculated using ImageJ.

## 468 **Virus growth analysis**

469 To measure viral spread, confluent monolayers of WT or KO MEFs were infected with 80  
470 p.f.u of vA5-GFP or 200 p.f.u of HSV-1 S17 Vp26-GFP in DMEM with 2 % FBS.  
471 Alternatively, for the single step virus replication analysis, cells were infected with 5 p.f.u/cell  
472 of vA5-GFP. Plates were rocked regularly at 37 °C for 2 h before incubating at 37 °C for the  
473 indicated times. Plaques were imaged using an Axiovert.A1 inverted fluorescence  
474 microscope connected to a Zeiss MRc colour camera and processed using Axiovision Rel.  
475 4.8 imaging software. To determine the viral titre, the medium and cells were collected,  
476 freeze-thawed three times, sonicated at 2.0 for 20 s three times (for VACV only) and titrated  
477 on BSC-1 or U2OS for VACV and HSV-1, respectively. For ZIKV infection and titration, 3 ×  
478 10<sup>6</sup> parental HEK293T or DDX50<sup>-/-</sup> cells were seeded on poly-D-lysine pre-coated 6-well  
479 plates. Cells were infected with ZIKV at MOI 0.1 the next day. Three infection p.i.,  
480 supernatants of the infected cells were collected and virus infectivity was titrated by plaque  
481 assay on Vero E6 cells. To titrate ZIKV samples, Vero E6 cells on 6-well plates (90%  
482 confluence) were infected for 2 h, the inoculum was removed and cells were incubated in  
483 MEM with 1.5% carboxymethyl cellulose for 5 d. Cells were then fixed with 4%  
484 paraformaldehyde (PFA) and stained with toluidine blue.

## 485 **Cell sub-fractionation**

486 Following stimulation for the times indicated, cells were washed in PBS and fractionated  
487 using the NE-PER™ Nuclear and Cytoplasmic Extraction Kit following the manufacturer's  
488 protocol (ThermoFisher).

## 489 **Immunofluorescence**

490 Briefly, cells were fixed in 4 % PFA/PBS for 20 min, washed in PBS, quenched in 150 mM  
491 NH<sub>4</sub>Cl/PBS for 10 min and permeabilised in 0.1 % Triton X-100/PBS for 10 min, before a  
492 final wash and block in 5 % FBS/PBS. Cells were stained by inverted incubation in 5 %  
493 FBS/PBS with anti-rabbit HA (dilution 1:100) antibody for 1 h, washed in 5 % FBS/PBS and

494 incubated for a further 30 min with the secondary goat anti-rabbit IgG Alexa-Fluor 488  
495 (Jackson immunoresearch; 111-545-003). Coverslips were mounted in Mowiol (10 % w/v  
496 Mowiol4–88 (CalBiochem), 25 % v/v glycerol, 100 mM Tris-HCl pH 8.5, 0.5 µg/ml DAPI (4',6-  
497 diamidino-2-phenylindole, Sigma) and images were acquired using a Zeiss LSM780 confocal  
498 laser scanning microscopy system and processed using the Zeiss Zen microscope and  
499 Axiovision 4.8 software.

## 500 **Statistics**

501 All experiments are presented as technical or biological averages where stated. Data  
502 presented are the mean +/- SD. All assays were analysed by unpaired T-test with GraphPad  
503 Prism 8 Software where  $p < 0.05 = *$ ,  $p < 0.01 = **$ ,  $p < 0.001 = ***$  and  $p < 0.0001 = ****$ .

504 **References**

- 505 1. McNab F, Mayer-Barber K, Sher A, Wack A, O'Garra A. Type I interferons in  
506 infectious disease. *Nat Rev Immunol*. 2015 Feb;15(2):87–103.
- 507 2. Boxx GM, Cheng G. The roles of type I interferon in bacterial infection. *Cell Host*  
508 *Microbe*. 2016 Jun;19(6):760–9.
- 509 3. Goubau D, Schlee M, Deddouche S, Pruijssers AJ, Zillinger T, Goldeck M, et al.  
510 Antiviral immunity via RIG-I-mediated recognition of RNA bearing 5'-diphosphates.  
511 *Nature*. 2014 Oct;514(7522):372–5.
- 512 4. Stetson DB, Medzhitov R. Recognition of cytosolic DNA activates an IRF3-dependent  
513 innate immune response. *Immunity*. 2006 Jan;24(1):93–103.
- 514 5. Fullam A, Schroder M. DExD/H-box RNA helicases as mediators of anti-viral innate  
515 immunity and essential host factors for viral replication. *Biochim Biophys Acta*. 2013  
516 Aug;1829(8):854–65.
- 517 6. De Nardo D. Activation of the innate immune receptors: guardians of the micro  
518 galaxy: activation and functions of the innate immune receptors. *Adv Exp Med Biol*.  
519 2017;1024:1–35.
- 520 7. Schafer SL, Lin R, Moore PA, Hiscott J, Pitha PM. Regulation of type I interferon gene  
521 expression by interferon regulatory factor-3. *J Biol Chem*. 1998 Jan;273(5):2714–20.
- 522 8. Nakaya T, Sato M, Hata N, Asagiri M, Suemori H, Noguchi S, et al. Gene induction  
523 pathways mediated by distinct IRFs during viral infection. *Biochem Biophys Res*  
524 *Commun*. 2001 May;283(5):1150–6.
- 525 9. Cui S, Eisenacher K, Kirchofer A, Brzozka K, Lammens A, Lammens K, et al. The C-  
526 terminal regulatory domain is the RNA 5'-triphosphate sensor of RIG-I. *Mol Cell*. 2008  
527 Feb;29(2):169–79.
- 528 10. Gack MU, Shin YC, Joo C-H, Urano T, Liang C, Sun L, et al. TRIM25 RING-finger E3  
529 ubiquitin ligase is essential for RIG-I-mediated antiviral activity. *Nature*.  
530 England; 2007. p. 916–20.
- 531 11. Pichlmair A, Schulz O, Tan C-P, Rehwinkel J, Kato H, Takeuchi O, et al. Activation of  
532 MDA5 requires higher-order RNA structures generated during virus infection. *J Virol*.  
533 2009 Oct;83(20):10761–9.
- 534 12. Zust R, Cervantes-Barragan L, Habjan M, Maier R, Neuman BW, Ziebuhr J, et al.  
535 Ribose 2'-O-methylation provides a molecular signature for the distinction of self and  
536 non-self mRNA dependent on the RNA sensor Mda5. *Nat Immunol*. 2011  
537 Feb;12(2):137–43.
- 538 13. Miyashita M, Oshiumi H, Matsumoto M, Seya T. DDX60, a DEXD/H box helicase, is a  
539 novel antiviral factor promoting RIG-I-like receptor-mediated signaling. *Mol Cell Biol*.  
540 2011 Sep;31(18):3802–19.
- 541 14. Oshiumi H, Miyashita M, Okamoto M, Morioka Y, Okabe M, Matsumoto M, et al.  
542 DDX60 is involved in RIG-I-dependent and independent antiviral responses, and its  
543 function is attenuated by virus-induced EGFR activation. *Cell Rep*. 2015  
544 May;11(8):1193–207.
- 545 15. Zhang Z, Kim T, Bao M, Facchinetti V, Jung SY, Ghaffari AA, et al. DDX1, DDX21,  
546 and DHX36 helicases form a complex with the adaptor molecule TRIF to sense  
547 dsRNA in dendritic cells. *Immunity*. 2011 Jun;34(6):866–78.



- 548 16. Mitoma H, Hanabuchi S, Kim T, Bao M, Zhang Z, Sugimoto N, et al. The DHX33 RNA  
549 helicase senses cytosolic RNA and activates the NLRP3 inflammasome. *Immunity*.  
550 2013 Jul;39(1):123–35.
- 551 17. Zhang Z, Yuan B, Bao M, Lu N, Kim T, Liu Y-J. The helicase DDX41 senses  
552 intracellular DNA mediated by the adaptor STING in dendritic cells. *Nat Immunol*.  
553 2011 Sep;12(10):959–65.
- 554 18. Goubau D, van der Veen AG, Chakravarty P, Lin R, Rogers N, Rehwinkel J, et al.  
555 Mouse superkiller-2-like helicase DDX60 is dispensable for type I IFN induction and  
556 immunity to multiple viruses. *Eur J Immunol*. 2015 Dec;45(12):3386–403.
- 557 19. van der Lee R, Feng Q, Langereis MA, Ter Horst R, Szklarczyk R, Netea MG, et al.  
558 Integrative genomics-based discovery of novel regulators of the innate antiviral  
559 response. *PLoS Comput Biol*. 2015 Oct;11(10):e1004553.
- 560 20. Ohnishi S, Paakkonen K, Koshiha S, Tochio N, Sato M, Kobayashi N, et al. Solution  
561 structure of the GUCT domain from human RNA helicase II/Gu beta reveals the RRM  
562 fold, but implausible RNA interactions. *Proteins*. 2009 Jan;74(1):133–44.
- 563 21. Valdez BC, Perlaky L, Henning D. Expression, cellular localization, and enzymatic  
564 activities of RNA helicase II/Gu(beta). *Exp Cell Res*. 2002 Jun;276(2):249–63.
- 565 22. Westermarck J, Weiss C, Saffrich R, Kast J, Musti A-M, Wessely M, et al. The  
566 DEXD/H-box RNA helicase RHII/Gu is a co-factor for c-Jun-activated transcription.  
567 *EMBO J*. 2002 Feb;21(3):451–60.
- 568 23. Lehmann MH, Kastenmuller W, Kandemir JD, Brandt F, Suezter Y, Sutter G. Modified  
569 vaccinia virus ankara triggers chemotaxis of monocytes and early respiratory  
570 immigration of leukocytes by induction of CCL2 expression. *J Virol*. 2009  
571 Mar;83(6):2540–52.
- 572 24. Everett RD, Bell AJ, Lu Y, Orr A. The replication defect of ICP0-null mutant herpes  
573 simplex virus 1 can be largely complemented by the combined activities of human  
574 cytomegalovirus proteins IE1 and pp71. *J Virol*. 2013 Jan;87(2):978–90.
- 575 25. Smith GL, Vanderplasschen A, Law M. The formation and function of extracellular  
576 enveloped vaccinia virus. *J Gen Virol*. 2002 Dec;83(Pt 12):2915–31.
- 577 26. Roberts KL, Smith GL. Vaccinia virus morphogenesis and dissemination. *Trends*  
578 *Microbiol*. 2008 Oct;16(10):472–9.
- 579 27. Ward AM, Bidet K, Yinglin A, Ler SG, Hogue K, Blackstock W, et al. Quantitative  
580 mass spectrometry of DENV-2 RNA-interacting proteins reveals that the DEAD-box  
581 RNA helicase DDX6 binds the DB1 and DB2 3' UTR structures. *RNA Biol*.  
582 2011;8(6):1173–86.
- 583 28. Li G, Feng T, Pan W, Shi X, Dai J. DEAD-box RNA helicase DDX3X inhibits DENV  
584 replication via regulating type one interferon pathway. *Biochem Biophys Res*  
585 *Commun*. 2015 Jan 2;456(1):327–32.
- 586 29. Han P, Ye W, Lv X, Ma H, Weng D, Dong Y, et al. DDX50 inhibits the replication of  
587 dengue virus 2 by upregulating IFN-beta production. *Arch Virol*. 2017  
588 Jun;162(6):1487–94.
- 589 30. Ishikawa H, Ma Z, Barber GN. STING regulates intracellular DNA-mediated, type I  
590 interferon-dependent innate immunity. *Nature*. 2009 Oct;461(7265):788–92.
- 591 31. Wang X, Majumdar T, Kessler P, Ozhegov E, Zhang Y, Chattopadhyay S, et al.  
592 STING Requires the Adaptor TRIF to Trigger Innate Immune Responses to Microbial

- 593 Infection. *Cell Host Microbe*. 2016 Sep;20(3):329–41.
- 594 32. Chiang JJ, Sparrer KMJ, van Gent M, Lässig C, Huang T, Osterrieder N, et al. Viral  
595 unmasking of cellular 5S rRNA pseudogene transcripts induces RIG-I-mediated  
596 immunity. *Nat Immunol*. 2018 Jan;19(1):53–62.
- 597 33. Liu Y, Goulet M-L, Sze A, Hadj SB, Belgnaoui SM, Lababidi RR, et al. RIG-I-Mediated  
598 STING Upregulation Restricts Herpes Simplex Virus 1 Infection. *J Virol*. 2016  
599 Oct;90(20):9406–19.
- 600 34. Rice AP, Roberts WK, Kerr IM. 2-5A accumulates to high levels in interferon-treated,  
601 vaccinia virus-infected cells in the absence of any inhibition of virus replication. *J Virol*.  
602 1984 Apr;50(1):220–8.
- 603 35. Liu S-W, Katsafanas GC, Liu R, Wyatt LS, Moss B. Poxvirus decapping enzymes  
604 enhance virulence by preventing the accumulation of dsRNA and the induction of  
605 innate antiviral responses. *Cell Host Microbe*. 2015 Mar;17(3):320–31.
- 606 36. Moss B. Poxviridae. In: ed. Knipe DM HP, editor. *Fields Virology*. Lippincott Williams  
607 & Wilkins, Philadelphia; 2013. p. 2905–2946.
- 608 37. Price PJR, Torres-Domínguez LE, Brandmüller C, Sutter G, Lehmann MH. Modified  
609 Vaccinia virus Ankara: innate immune activation and induction of cellular signalling.  
610 *Vaccine*. 2013 Sep;31(39):4231–4.
- 611 38. Chang HW, Watson JC, Jacobs BL. The E3L gene of vaccinia virus encodes an  
612 inhibitor of the interferon-induced, double-stranded RNA-dependent protein kinase.  
613 *Proc Natl Acad Sci U S A*. 1992 Jun;89(11):4825–9.
- 614 39. Brandt TA, Jacobs BL. Both carboxy- and amino-terminal domains of the vaccinia  
615 virus interferon resistance gene, E3L, are required for pathogenesis in a mouse  
616 model. *J Virol*. 2001 Jan;75(2):850–6.
- 617 40. Carter GC, Rodger G, Murphy BJ, Law M, Krauss O, Hollinshead M, et al. Vaccinia  
618 virus cores are transported on microtubules. *J Gen Virol*. 2003 Sep;84(Pt 9):2443–58.
- 619 41. Blanchard TJ, Alcamí A, Andrea P, Smith GL. Modified vaccinia virus Ankara  
620 undergoes limited replication in human cells and lacks several immunomodulatory  
621 proteins: implications for use as a human vaccine. *J Gen Virol*. 1998 May;79 ( Pt  
622 5):1159–67.
- 623 42. Hollinshead M, Johns HL, Sayers CL, Gonzalez-Lopez C, Smith GL, Elliott G.  
624 Endocytic tubules regulated by Rab GTPases 5 and 11 are used for envelopment of  
625 herpes simplex virus. *EMBO J*. 2012 Nov;31(21):4204–20.
- 626 43. Beard PM, Froggatt GC, Smith GL. Vaccinia virus kelch protein A55 is a 64 kDa  
627 intracellular factor that affects virus-induced cytopathic effect and the outcome of  
628 infection in a murine intradermal model. *J Gen Virol*. 2006 Jun;87(Pt 6):1521–9.
- 629 44. Mutso M, Saul S, Rausalu K, Susova O, Žusinaite E, Mahalingam S, et al. Reverse  
630 genetic system, genetically stable reporter viruses and packaged subgenomic  
631 replicon based on a Brazilian Zika virus isolate. *J Gen Virol*. 2017 Nov;98(11):2712–  
632 24.
- 633 45. Ran FA, Hsu PD, Wright J, Agarwala V, Scott DA, Zhang F. Genome engineering  
634 using the CRISPR-Cas9 system. *Nat Protoc*. 2013 Nov;8(11):2281–308.
- 635 46. Pallett MA, Ren H, Zhang R-Y, Scutts SR, Gonzalez L, Zhu Z, et al. Vaccinia virus  
636 BBK E3 ligase adaptor A55 targets importin-dependent NF-kappaB activation and  
637 inhibits CD8(+) T-cell memory. *J Virol*. 2019 Feb;93(10):e00051-19.

- 638 47. Pallett MA, Berger CN, Pearson JS, Hartland EL, Frankel G. The type III secretion  
639 effector NleF of enteropathogenic *Escherichia coli* activates NF-kappaB early during  
640 infection. *Infect Immun*. 2014 Nov;82(11):4878–88.
- 641 48. Unterholzner L, Sumner RP, Baran M, Ren H, Mansur DS, Bourke NM, et al. Vaccinia  
642 virus protein C6 is a virulence factor that binds TBK-1 adaptor proteins and inhibits  
643 activation of IRF3 and IRF7. *PLoS Pathog*. 2011 Sep;7(9):e1002247.
- 644 49. Parkinson JE, Smith GL. Vaccinia virus gene A36R encodes a M(r) 43-50 K protein  
645 on the surface of extracellular enveloped virus. *Virology*. 1994 Oct;204(1):376–90.
- 646

647 **Fig. 1 DDX50 (RH-II/Guβ) is required for intracellular nucleic acid sensing.** Firefly  
648 luciferase activity of WT or *Ddx50*<sup>-/-</sup> MEFs transfected with plasmids encoding Firefly  
649 Luciferase under the *Ifnβ* promoter and Renilla. **(A)** Cells were left untreated or treated with  
650 5 µg/ml extracellular PolyIC (epIC), transfected with 5 µg/ml PolyIC (pIC) for 6 h or infected  
651 with Sendai virus (SeV) for 24 h. **(B)** WT or *Ddx50*<sup>-/-</sup> MEFs were transfected with  
652 lipofectamine only or 5 µg/ml pIC for 7 h, and the fold induction of *Isg56*, *Cxcl10* or *Ifnb*  
653 mRNA levels, relative to *Gapdh*, were analysed by RT-qPCR. **(C)** Secreted levels of  
654 CXCL10 and IL-6 in the medium at 7 h post transfection with PolyIC or **(D)** 4.5 h post  
655 infection with SeV were analysed by ELISA. **(E)** Firefly Luciferase activity of WT or *DDX50*<sup>-/-</sup>  
656 HEK293Ts transfected with plasmids encoding Firefly Luciferase under the *Ifnβ* promoter  
657 and Renilla. Cells were infected for 24 h with SeV or left untreated. Data are representative  
658 of at least three independent experiments. **(F)** Secreted levels of CXCL10 in the medium at  
659 24 h post infection of WT or *DDX50*<sup>-/-</sup> HEK293Ts with SeV, were analysed by ELISA. Data  
660 are representative of at least three independent experiments. Statistical significance shown  
661 for WT stimulated vs KO stimulated.

662 **Fig. 2 DDX50 rescues nucleic acid sensing in *Ddx50*<sup>-/-</sup> MEFs.** **(A-C)** WT MEFs  
663 transduced with pLDT-EV and *Ddx50*<sup>-/-</sup> MEFs transduced with pLDT-EV or pLDT-*Ddx50*  
664 were transfected with lipofectamine only or 5 µg/ml PolyIC for 7 h. **(A)** *Isg56*, *Cxcl10* or *Ifnb*  
665 mRNA levels, relative to *Gapdh*, were analysed by RT-qPCR and **(B)** secreted CXCL10 was  
666 measured by ELISA. Representative of at least two independent experiments. Statistical  
667 significance shown for WT stimulated vs KO stimulated. **(C)** Expression of DDX50 was  
668 confirmed by SDS-PAGE and immunoblotting.

669 **Fig. 3 DDX50 is required for IRF3-dependent signalling in response to the dsDNA**  
670 **viruses HSV-1 and VACV.** WT MEFs or *Ddx50*<sup>-/-</sup> MEFs were infected for 3 or 6 h at 10  
671 p.f.u./cell with HSV-1 S17 ΔICPO **(A and C)** or MVA **(B and D)** or left uninfected. **(A-B)**  
672 mRNA was extracted and *ifnb*, *Isg56* and *Cxcl10* levels were analysed by RT-qPCR relative  
673 to *Gapdh*. Representative of at least two independent experiments. **(C-D)** Secretion of

674 CXCL10 and IL-6 were measured at 3 and 6 h post infection by ELISA. Representative of  
675 three independent experiments performed in quadruplicate. Statistical significance shown for  
676 WT infected vs KO infected.

677 **Fig. 4 DDX50 (RH-II/Gu $\beta$ ) is not required for NF- $\kappa$ B-dependent gene transcription. (A)**  
678 WT or *Ddx50*<sup>-/-</sup> MEFs were transfected with pNF- $\kappa$ B-Luc or pTK-RL, as an internal control.  
679 Cells were left untreated or stimulated for 7 h with 100 ng/ml IL-1 $\alpha$  and Firefly Luciferase  
680 activity was measured. **(B and C)** WT or *Ddx50*<sup>-/-</sup> MEFs were left untreated or stimulated for  
681 1 h with 100 ng/ml TNF $\alpha$  **(B)** or IL-1 $\alpha$  **(C)**. Following mRNA extraction, the fold induction of  
682 *Nfkb1a* and *Il-6* mRNA levels relative to *Gapdh* were analysed by RT-qPCR. Representative  
683 of 3 independent experiments. Statistical significance shown for WT infected vs KO infected.

684 **Fig. 5 DDX50 accumulates in the cytoplasm in response to cytoplasmic dsRNA and**  
685 **acts upstream to, or independent of, MAVS activation. (A and B)** Representative  
686 immunoblot of phosphorylated IRF3 at **(A)** Ser396 or **(B)** Ser386 (pIRF3) for **(A)** WT or  
687 *Ddx50*<sup>-/-</sup> MEFs transfected with lipofectamine only or 5  $\mu$ g/ml PolyIC for 3 and 6 h or **(B)** WT  
688 and DDX50<sup>-/-</sup> HEK293Ts untreated or infected with SeV for 18 h. Level of IRF3  
689 phosphorylation was calculated by densitometry, relative to  $\alpha$ -tubulin **(A)** or actin **(B)** and is  
690 representative of at least two independent experiments. **(C)** Representative immunoblot  
691 following transfection of WT MEFs with 2.5  $\mu$ g/ml PolyIC for the indicated times and isolation  
692 of the cytoplasmic (cyt) and nuclear fractions (nuc). Immunoblots were stained for DDX50 or  
693  $\alpha$ -tubulin and laminA/C as cytoplasmic and nuclear fraction controls, respectively.  
694 Representative of three independent experiments. **(D)** Immunofluorescence staining for  
695 DDX50 localisation. HeLa cells were transfected with pLDT-DDX50-HA and left uninfected  
696 (NI) or infected for 1.5 h with SeV. DDX50 localisation was visualised using an anti-HA  
697 antibody. DAPI was used to stain the nucleus. Representative of three independent  
698 experiments. **(E)** Luciferase activity of WT or *Ddx50*<sup>-/-</sup> MEFs co-transfected with EV or  
699 indicated plasmids along with plasmids encoding Firefly Luciferase under the *Irfn $\beta$*  promoter  
700 and Renilla as an internal control. Experiments shown are representative of at least three

701 independent experiments. Statistical significance shown for WT stimulated vs KO stimulated.

702 **Fig. 6 DDX50 co-IPs TRIF and DDX1 and facilitates complex formation (A)** Schematic  
703 depicting the essential TRIF-binding domain of human DDX21 and the corresponding  
704 homologous region in DDX50 or DDX1 and DHX36 as a comparison. **(B)** Immunoblots from  
705 co-IP experiments of MEF DDX50-HA cell lines transiently transfected with GFP-Flag and  
706 TRIF-cTAP. **(C)** Immunoblots from co-IP experiments of HeLa cell lines transiently  
707 transfected with DDX50-HA along with GFP-Flag or TRIF-cTAP. Representative of two  
708 independent experiments. \*, non-specific band. **(D)** Immunoblots from co-IP experiments of  
709 HeLa cell lines transiently transfected with DDX50-HA or DDX28-HA and blotting for  
710 endogenous DDX1. **(E)** Immunoblots from co-IP experiments of HEK293T WT or DDX50 KO  
711 cells transiently transfected with TRIF-cTAP and blotting for endogenous DDX1.  
712 Experiments are representative of three independent experiments. IB, immunoblot; IP,  
713 immunoprecipitation.

714 **Fig. 7 DDX50 does not impact viral replication after high MOI. (A)** WT or *Ddx50*<sup>-/-</sup> MEFs  
715 were infected with A5-GFP VACV WR at 5 p.f.u./cell for 24 h. Viral titres were determined by  
716 plaque assay of the medium only (EEV) or total (medium plus cells) on BSC-1 cells. Average  
717 of three independent experiments. **(B and C)** WT or *Ddx50*<sup>-/-</sup> HEK293Ts were infected with  
718 **(B)** A5-GFP VACV WR at 5 p.f.u./cell for 16 h or **(C)** ZIKV at MOI 1 for 72 h. Viral titres were  
719 calculated by titration of cell lysates on Vero E6. Average of two independent experiments.  
720 Statistical significance shown for WT vs KO.

721

722 **Fig. 8 DDX50 is a viral restriction factor. (A-B)** Monolayers of WT or *Ddx50*<sup>-/-</sup> MEFs were  
723 infected with A5-GFP VACV WR at 80 p.f.u. (MOI = 0.0001). Viral titres at 24 h p.i. were  
724 determined by plaque assay on BS-C-1 cells and are represented as p.f.u./ml (left panel) or  
725 fold increase in replication relative to WT cells (right panel). **(B)** As in **(A)** but using WT or  
726 *DDX50*<sup>-/-</sup> HEK293Ts infected at MOI 0.0003 for 48 h. Results shown are representative of 2  
727 independent experiments. **(C)** Monolayers of WT or *Ddx50*<sup>-/-</sup> MEFs were infected with HSV-1  
728 S17 Vp26-GFP at 6600 p.f.u. (MOI = 0.01). Viral titres at 48 h p.i. were determined by  
729 plaque assay on U2OS cells and are represented as p.f.u./ml (left panel) and fold increase in  
730 replication relative to WT cells (right panel). **(D)** WT or *DDX50*<sup>-/-</sup> HEK293Ts were infected  
731 with ZIKV at MOI 0.1 for 72 h. Titres were determined by plaque assay on Vero E6 cells and

732 data are shown as for A-C. Titres shown are an average of 2 independent experiments. **(E)**  
733 Cells were infected at low MOI as in **(A)** and **(D)** and plaque numbers were enumerated 24 h  
734 p.i.. Data are expressed as the plaque formation efficiency on KO cells compared to WT  
735 cells. Representative of two independent experiments. **(F)** WT or *Ddx50*<sup>-/-</sup> MEFs were  
736 infected with A5-GFP VACV WR at MOI = 0.0001 and expression of the VACV late protein  
737 D8 was analysed by immunoblot at 24 h p.i. Representative of two independent  
738 experiments. **(G-H)** WT or *Ddx50*<sup>-/-</sup> MEFs transduced with pCW57-EV or pCW57-*Ddx50*-HA  
739 were infected as in **(G)**. Representative fluorescence images of plaque morphology following  
740 infection. Scale bar, 500 μM. **(H)** Viral titres at 24 h p.i. from cells infected as in **(G)** For all  
741 panels unless stated otherwise titres shown are representative of at least 3 independent  
742 experiments and fold changes shown are an average of at least 2 independent experiments.  
743 Statistical significance is shown for WT EV vs KO EV.

744 **Supporting information**

745 **Table S1. Constructs and primers used in the study**

746 **Table S2. Primers for qPCR**

747 **Fig. S1. CRISPR-Cas9 mediated knockout of *Ddx50/DDX50* (*RH-II/Guβ*) in fibroblasts.**

748 **Fig. S2. DDX50 overexpression augments nucleic acid sensing.**

749 **Fig. S3. Overexpression of DDX50 inhibits VACV dissemination and replication.**



○ WT □ KO

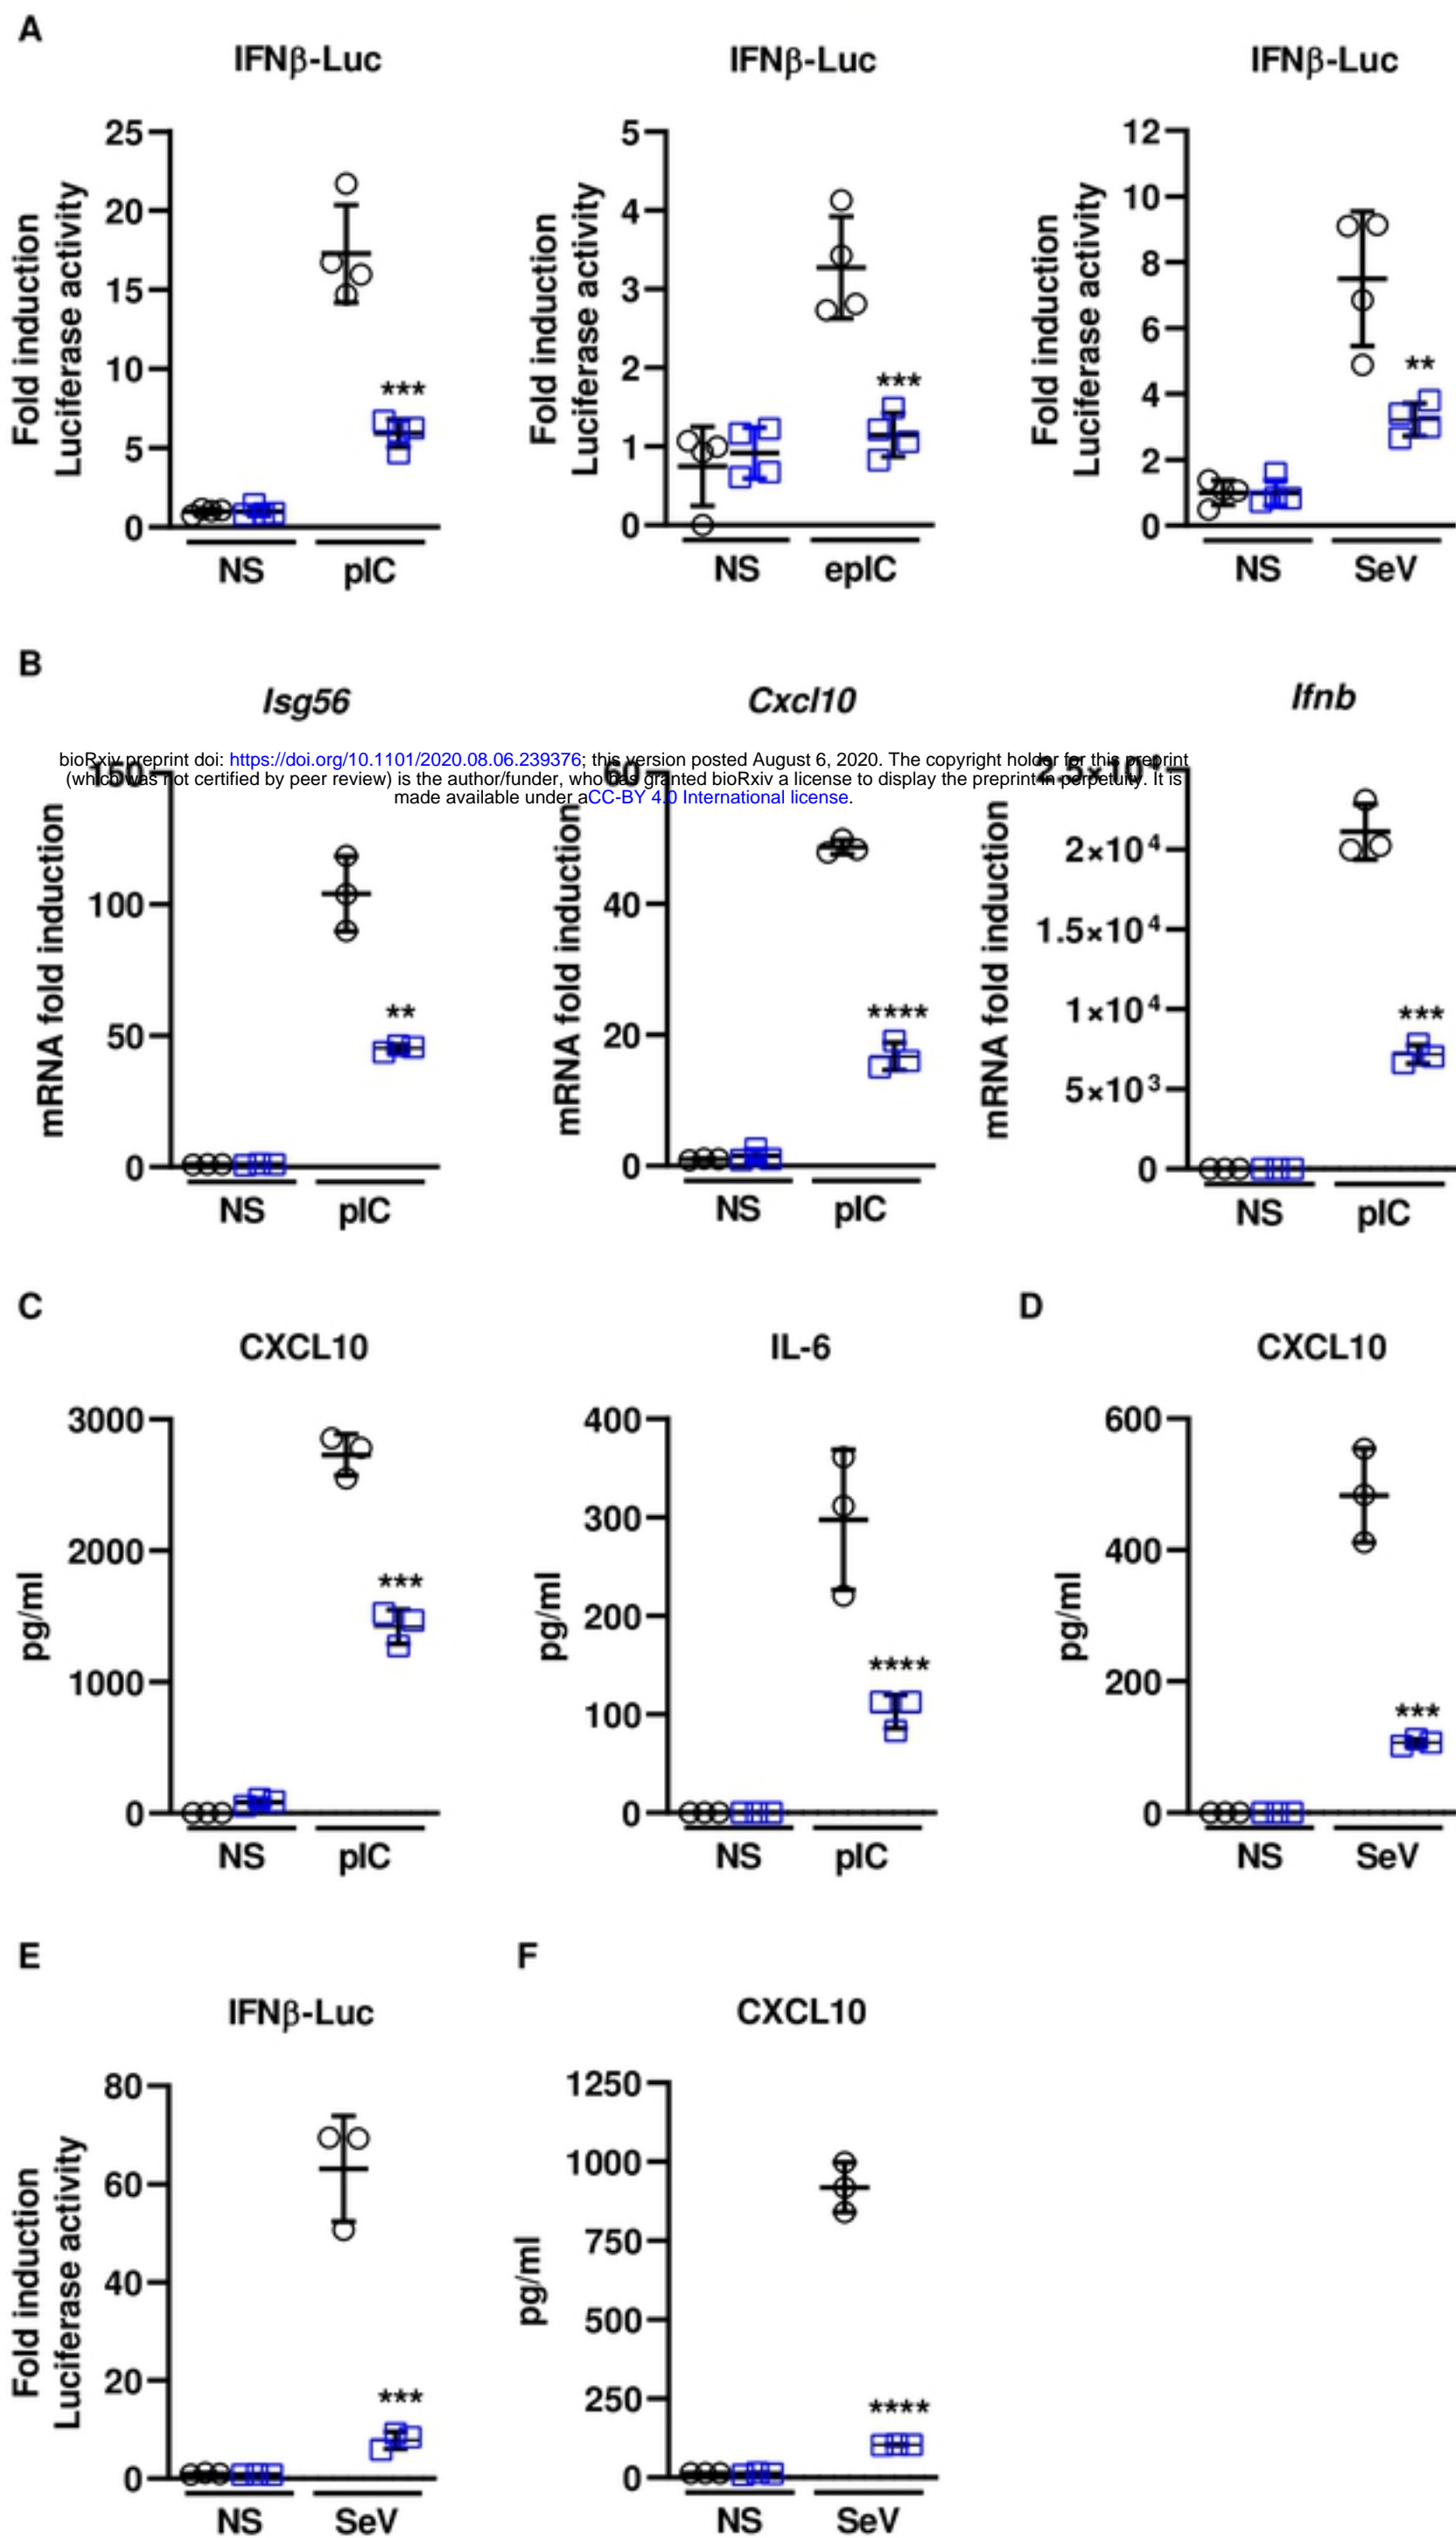

**Fig. 1**

○ WT    □ KO    △ KO + *Ddx50*

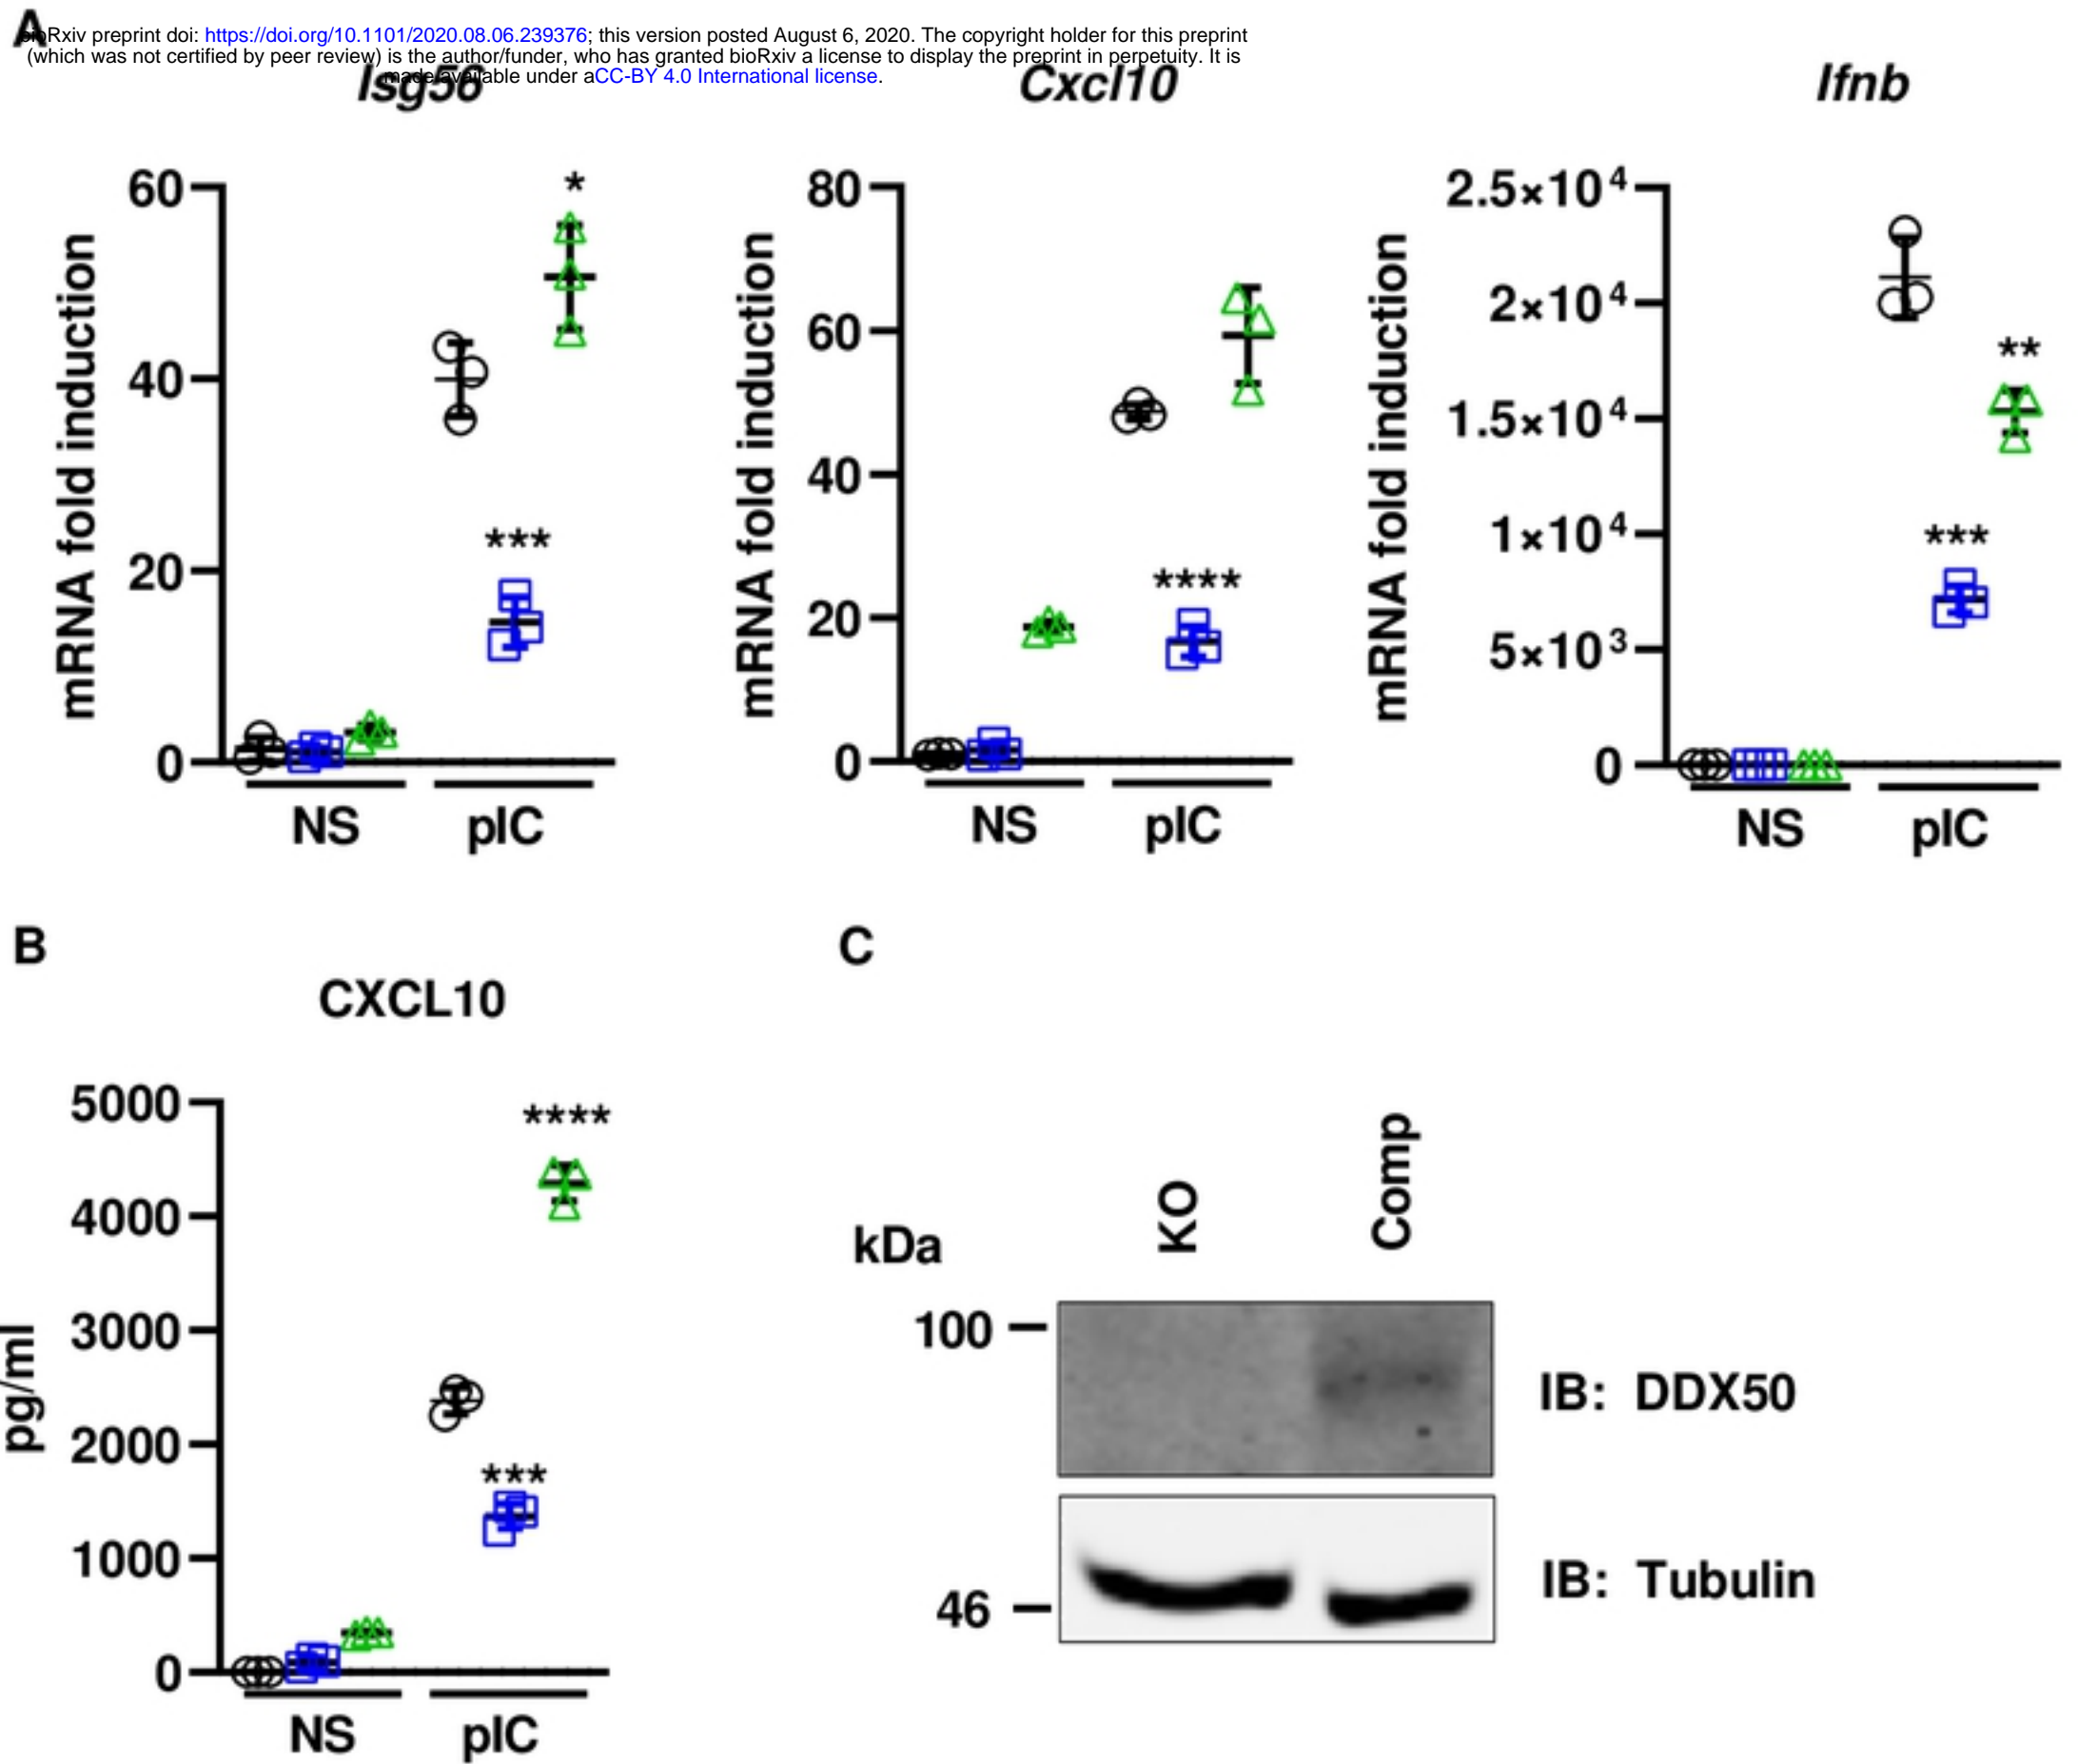

**Fig. 2**

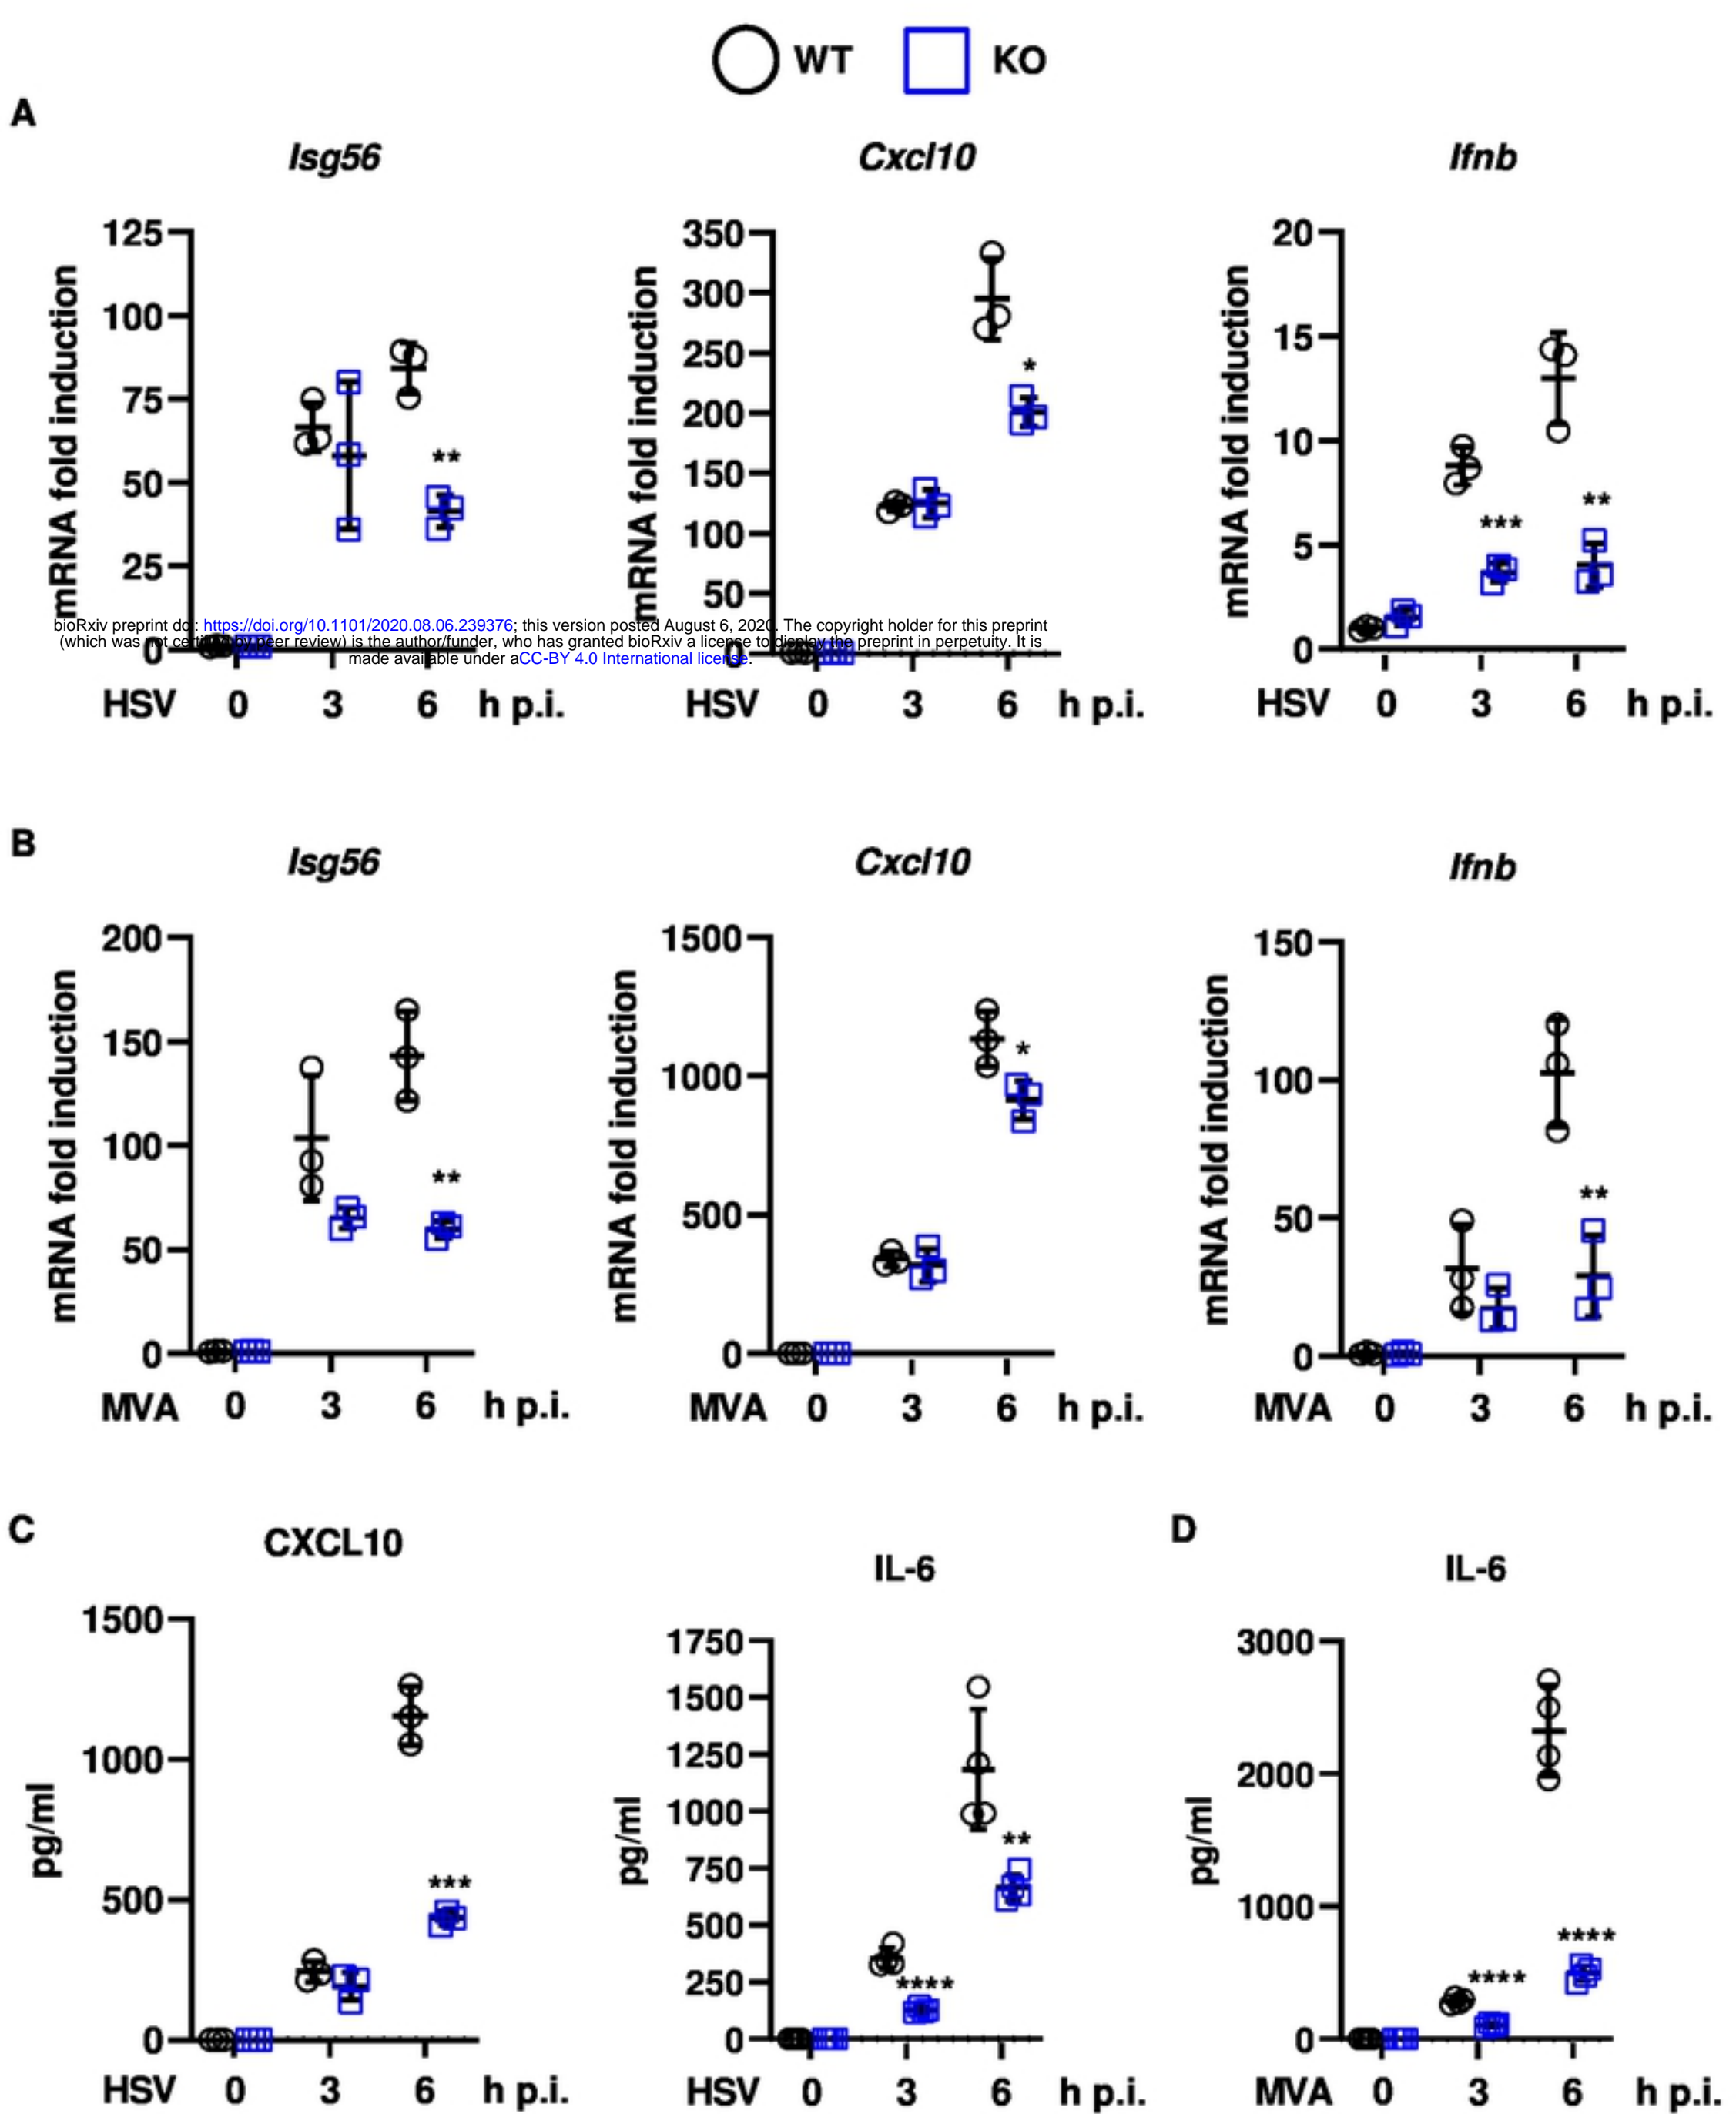

**Fig. 3**

○ WT    □ KO

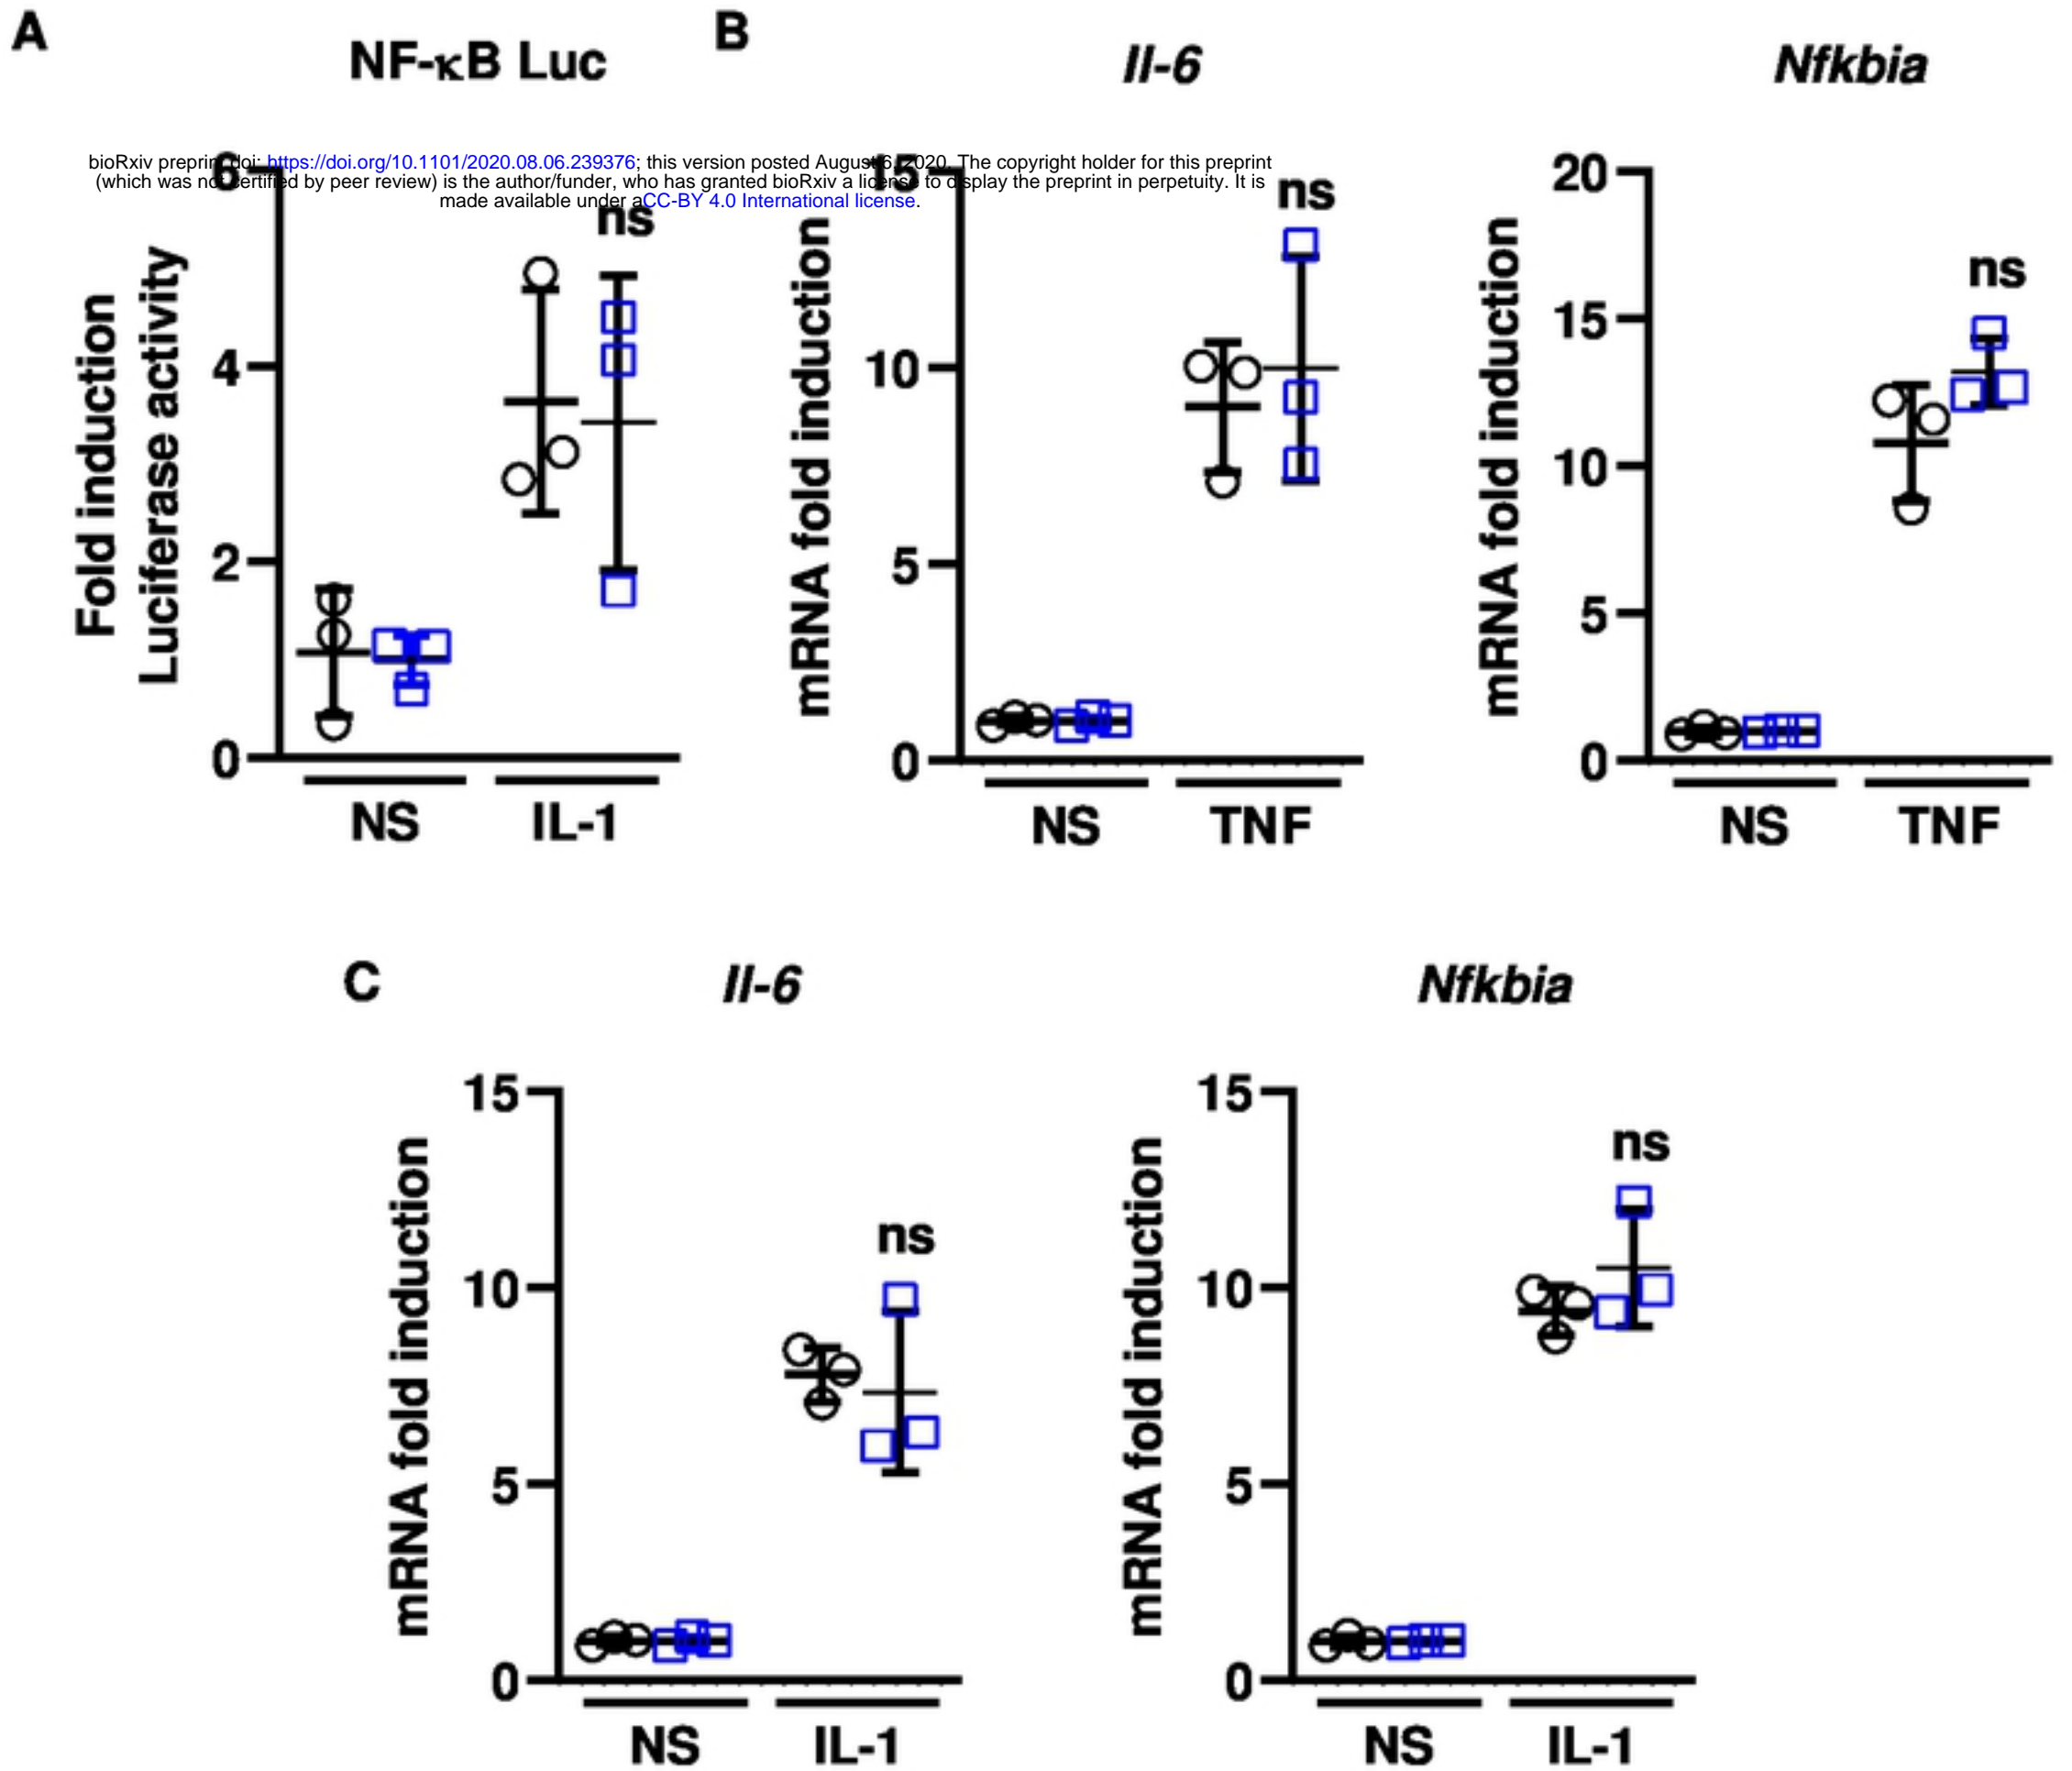

**Fig. 4**

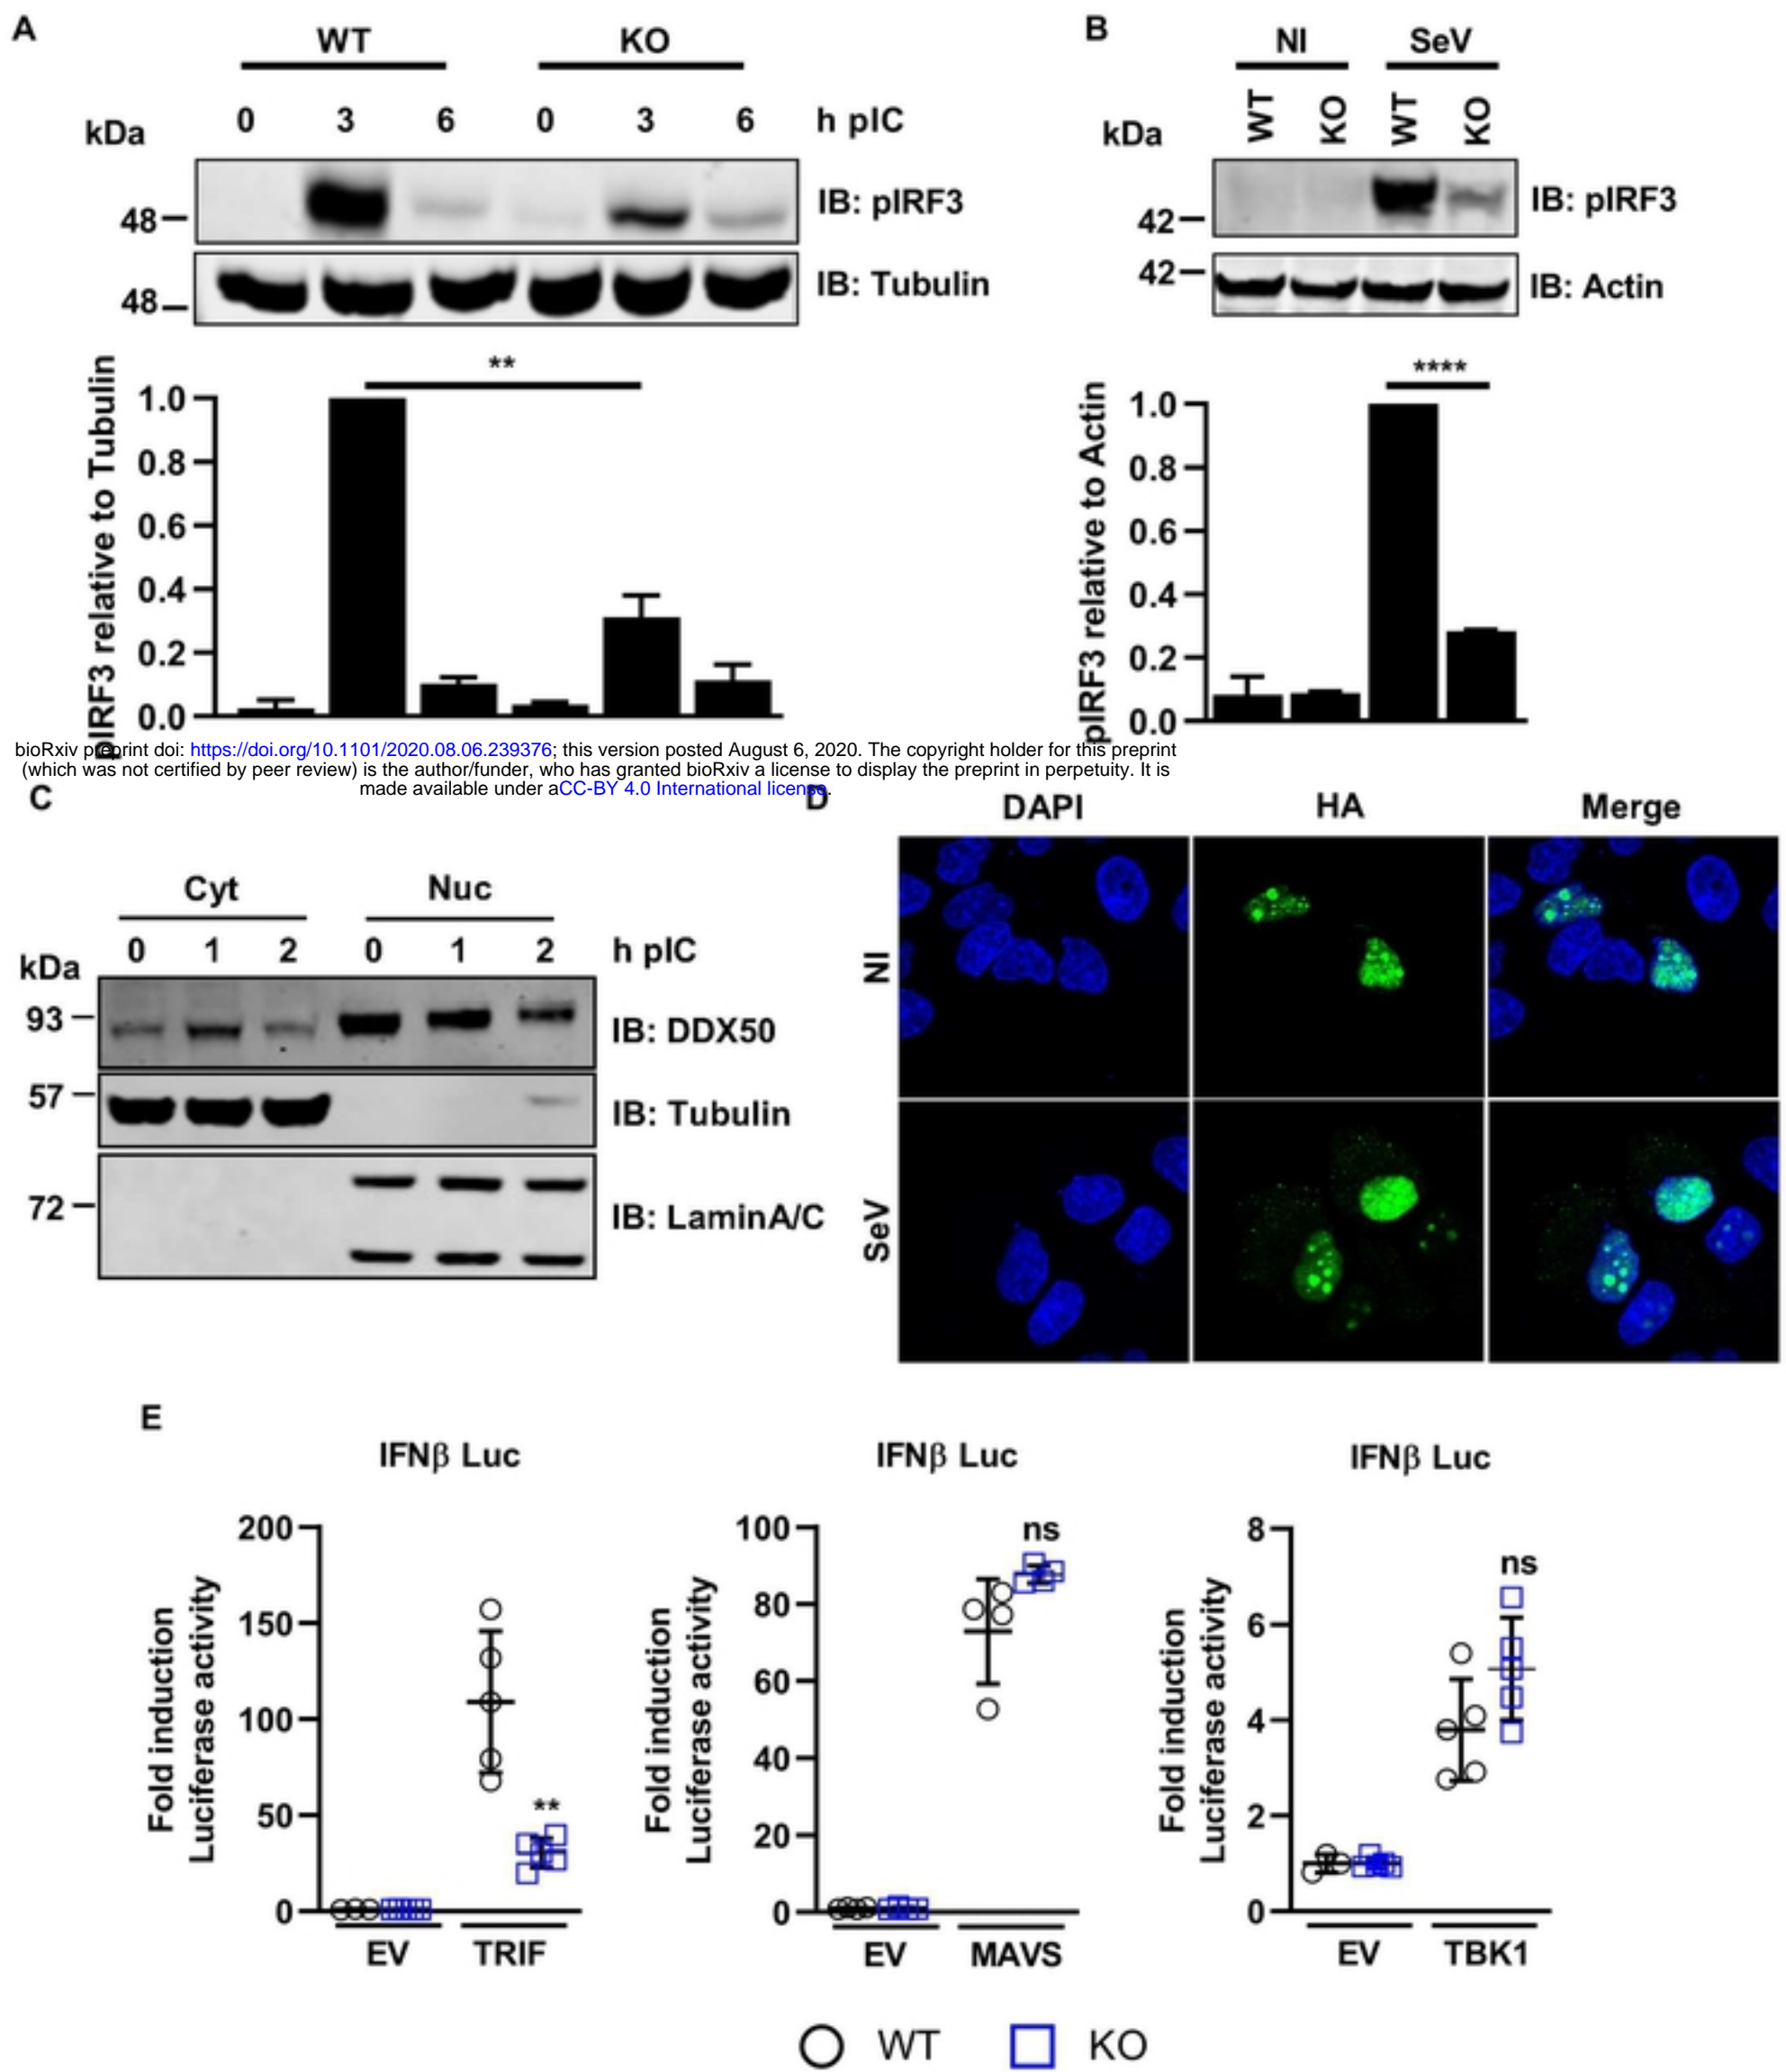

bioRxiv preprint doi: <https://doi.org/10.1101/2020.08.06.239376>; this version posted August 6, 2020. The copyright holder for this preprint (which was not certified by peer review) is the author/funder, who has granted bioRxiv a license to display the preprint in perpetuity. It is made available under aCC-BY 4.0 International license.

**Fig. 5**

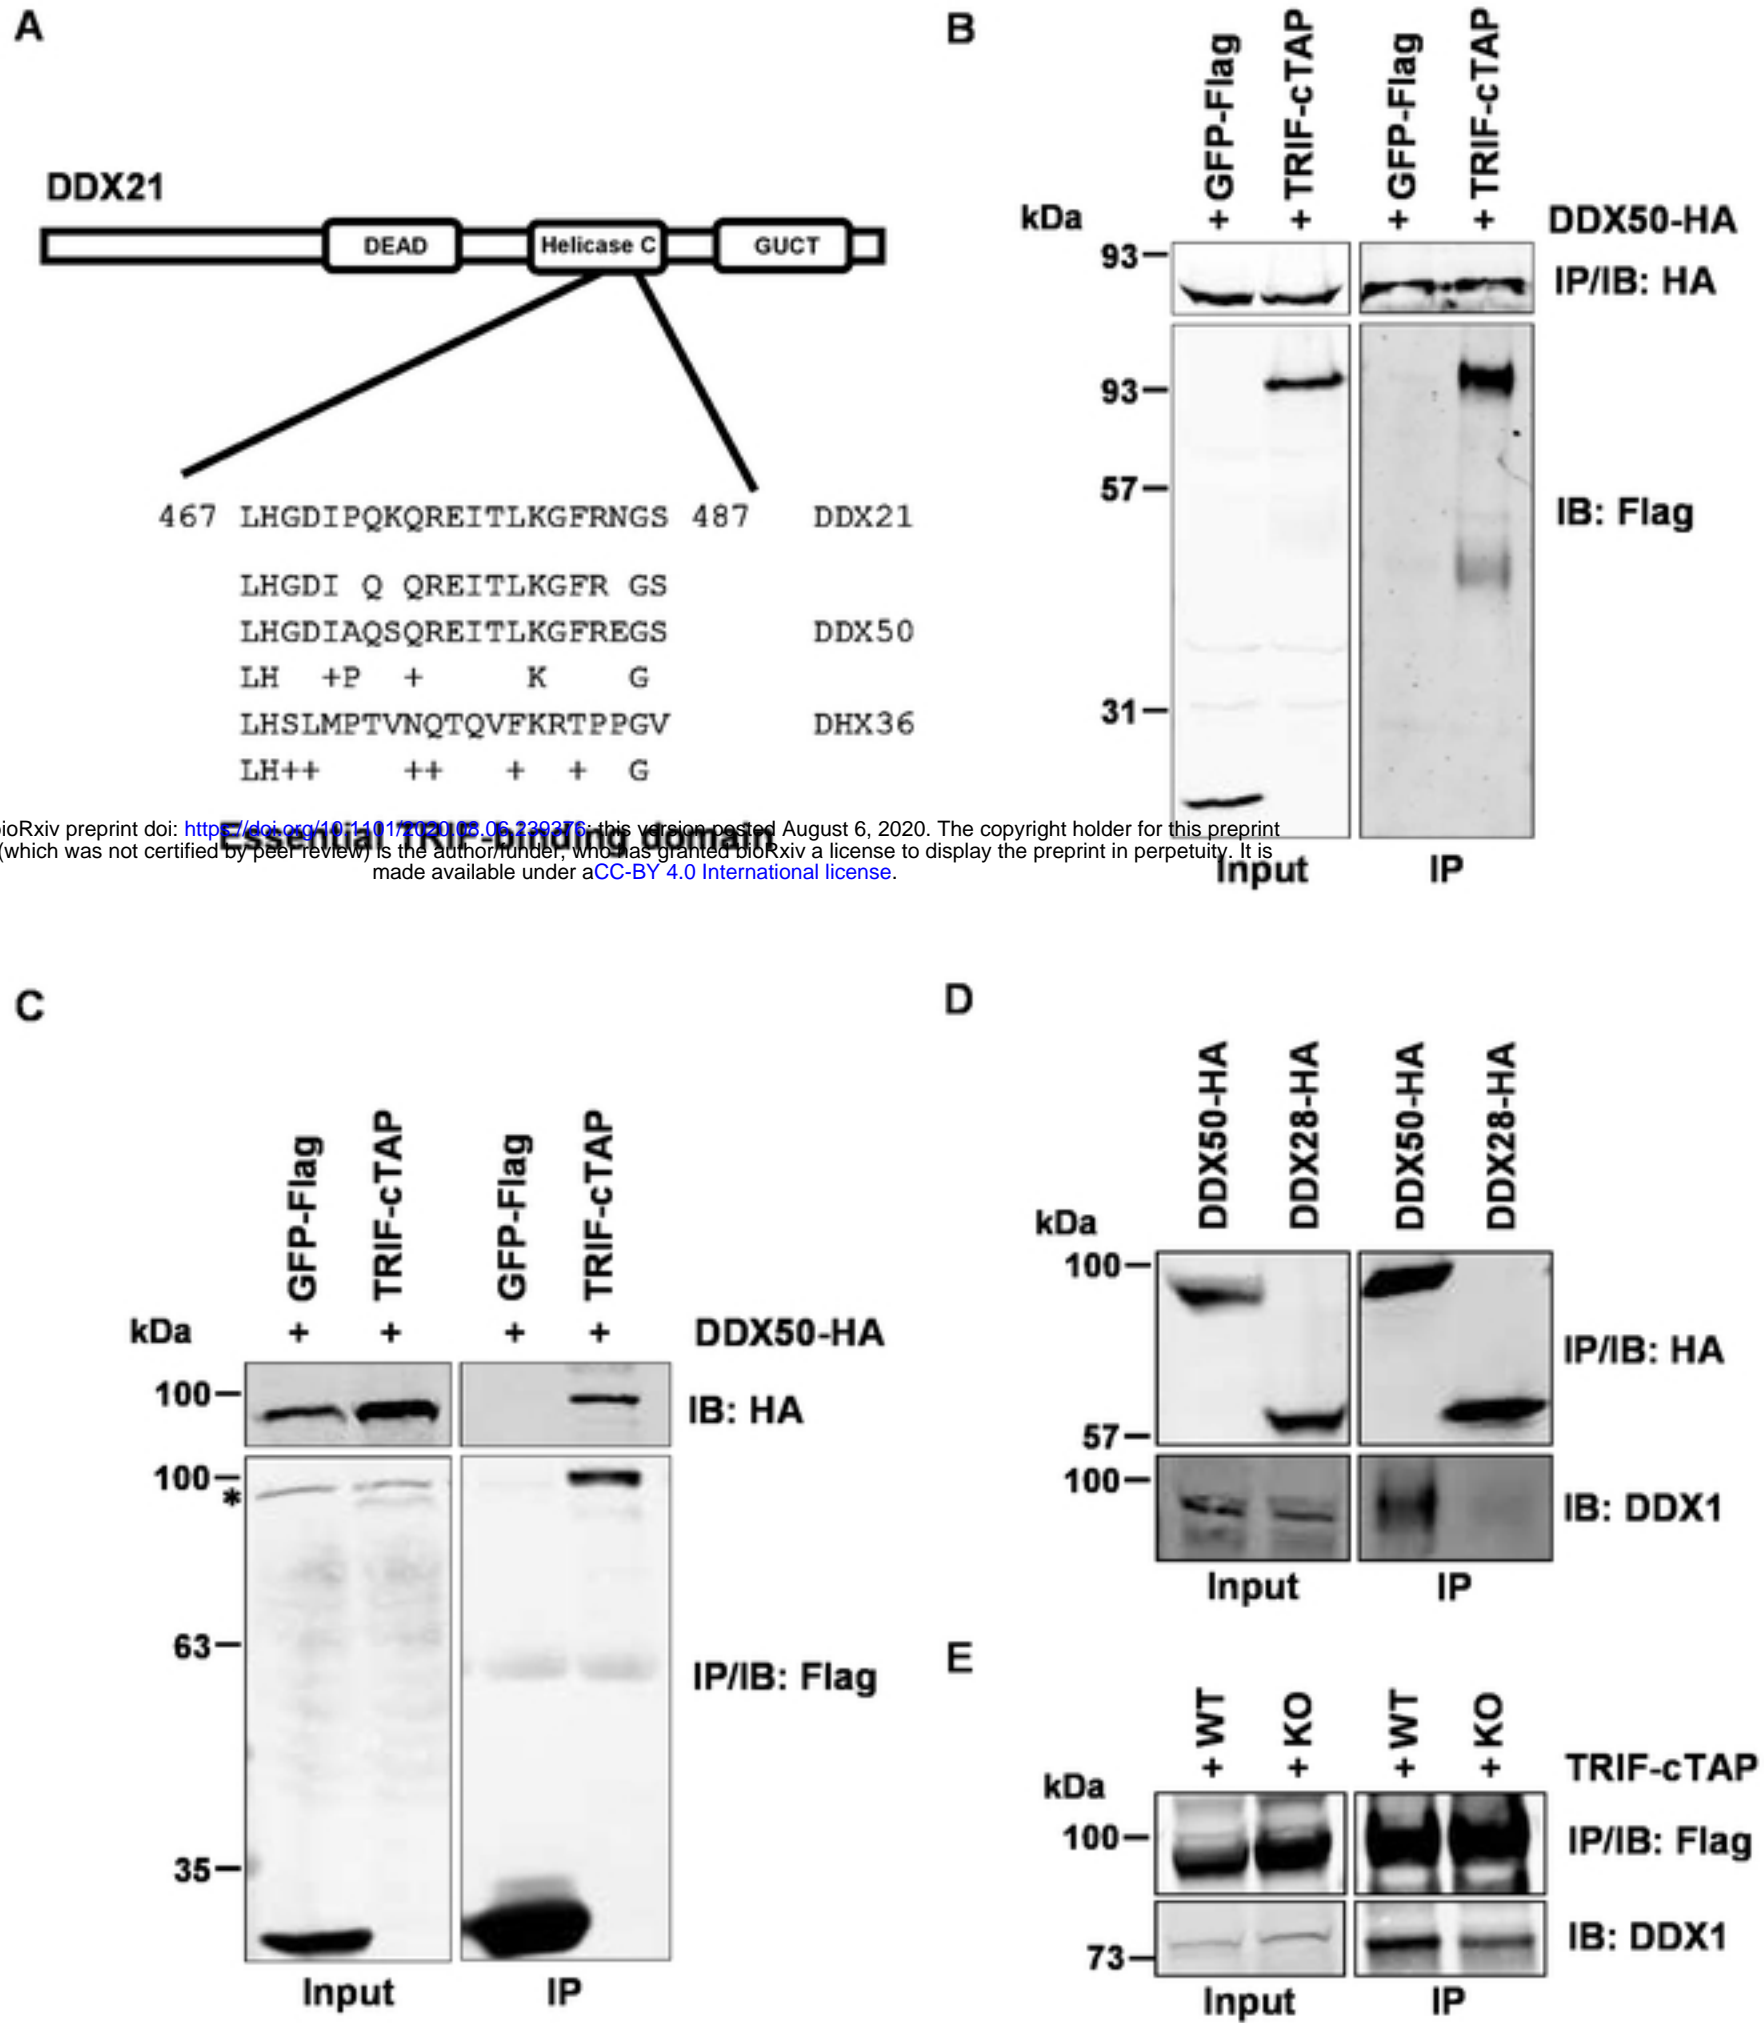

bioRxiv preprint doi: <https://doi.org/10.1101/2020.08.06.329276>; this version posted August 6, 2020. The copyright holder for this preprint (which was not certified by peer review) is the author/funder, who has granted bioRxiv a license to display the preprint in perpetuity. It is made available under aCC-BY 4.0 International license.

**Fig. 6**

○ WT    □ KO

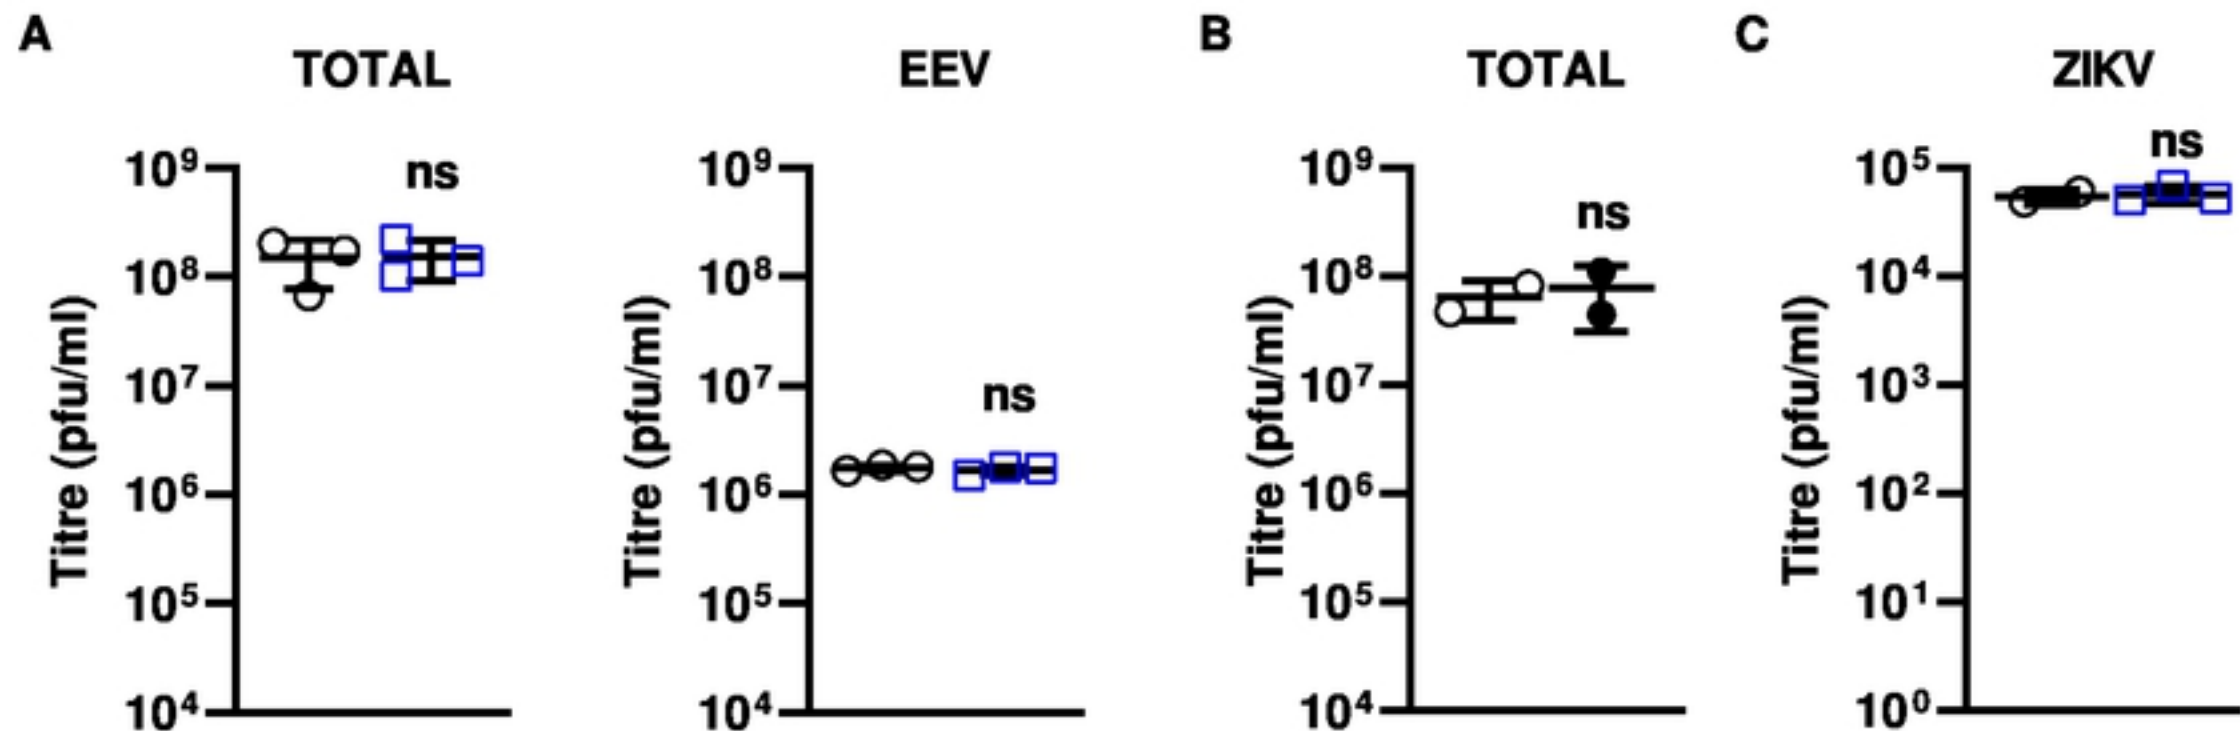

**Fig. 7**

○ WT □ KO

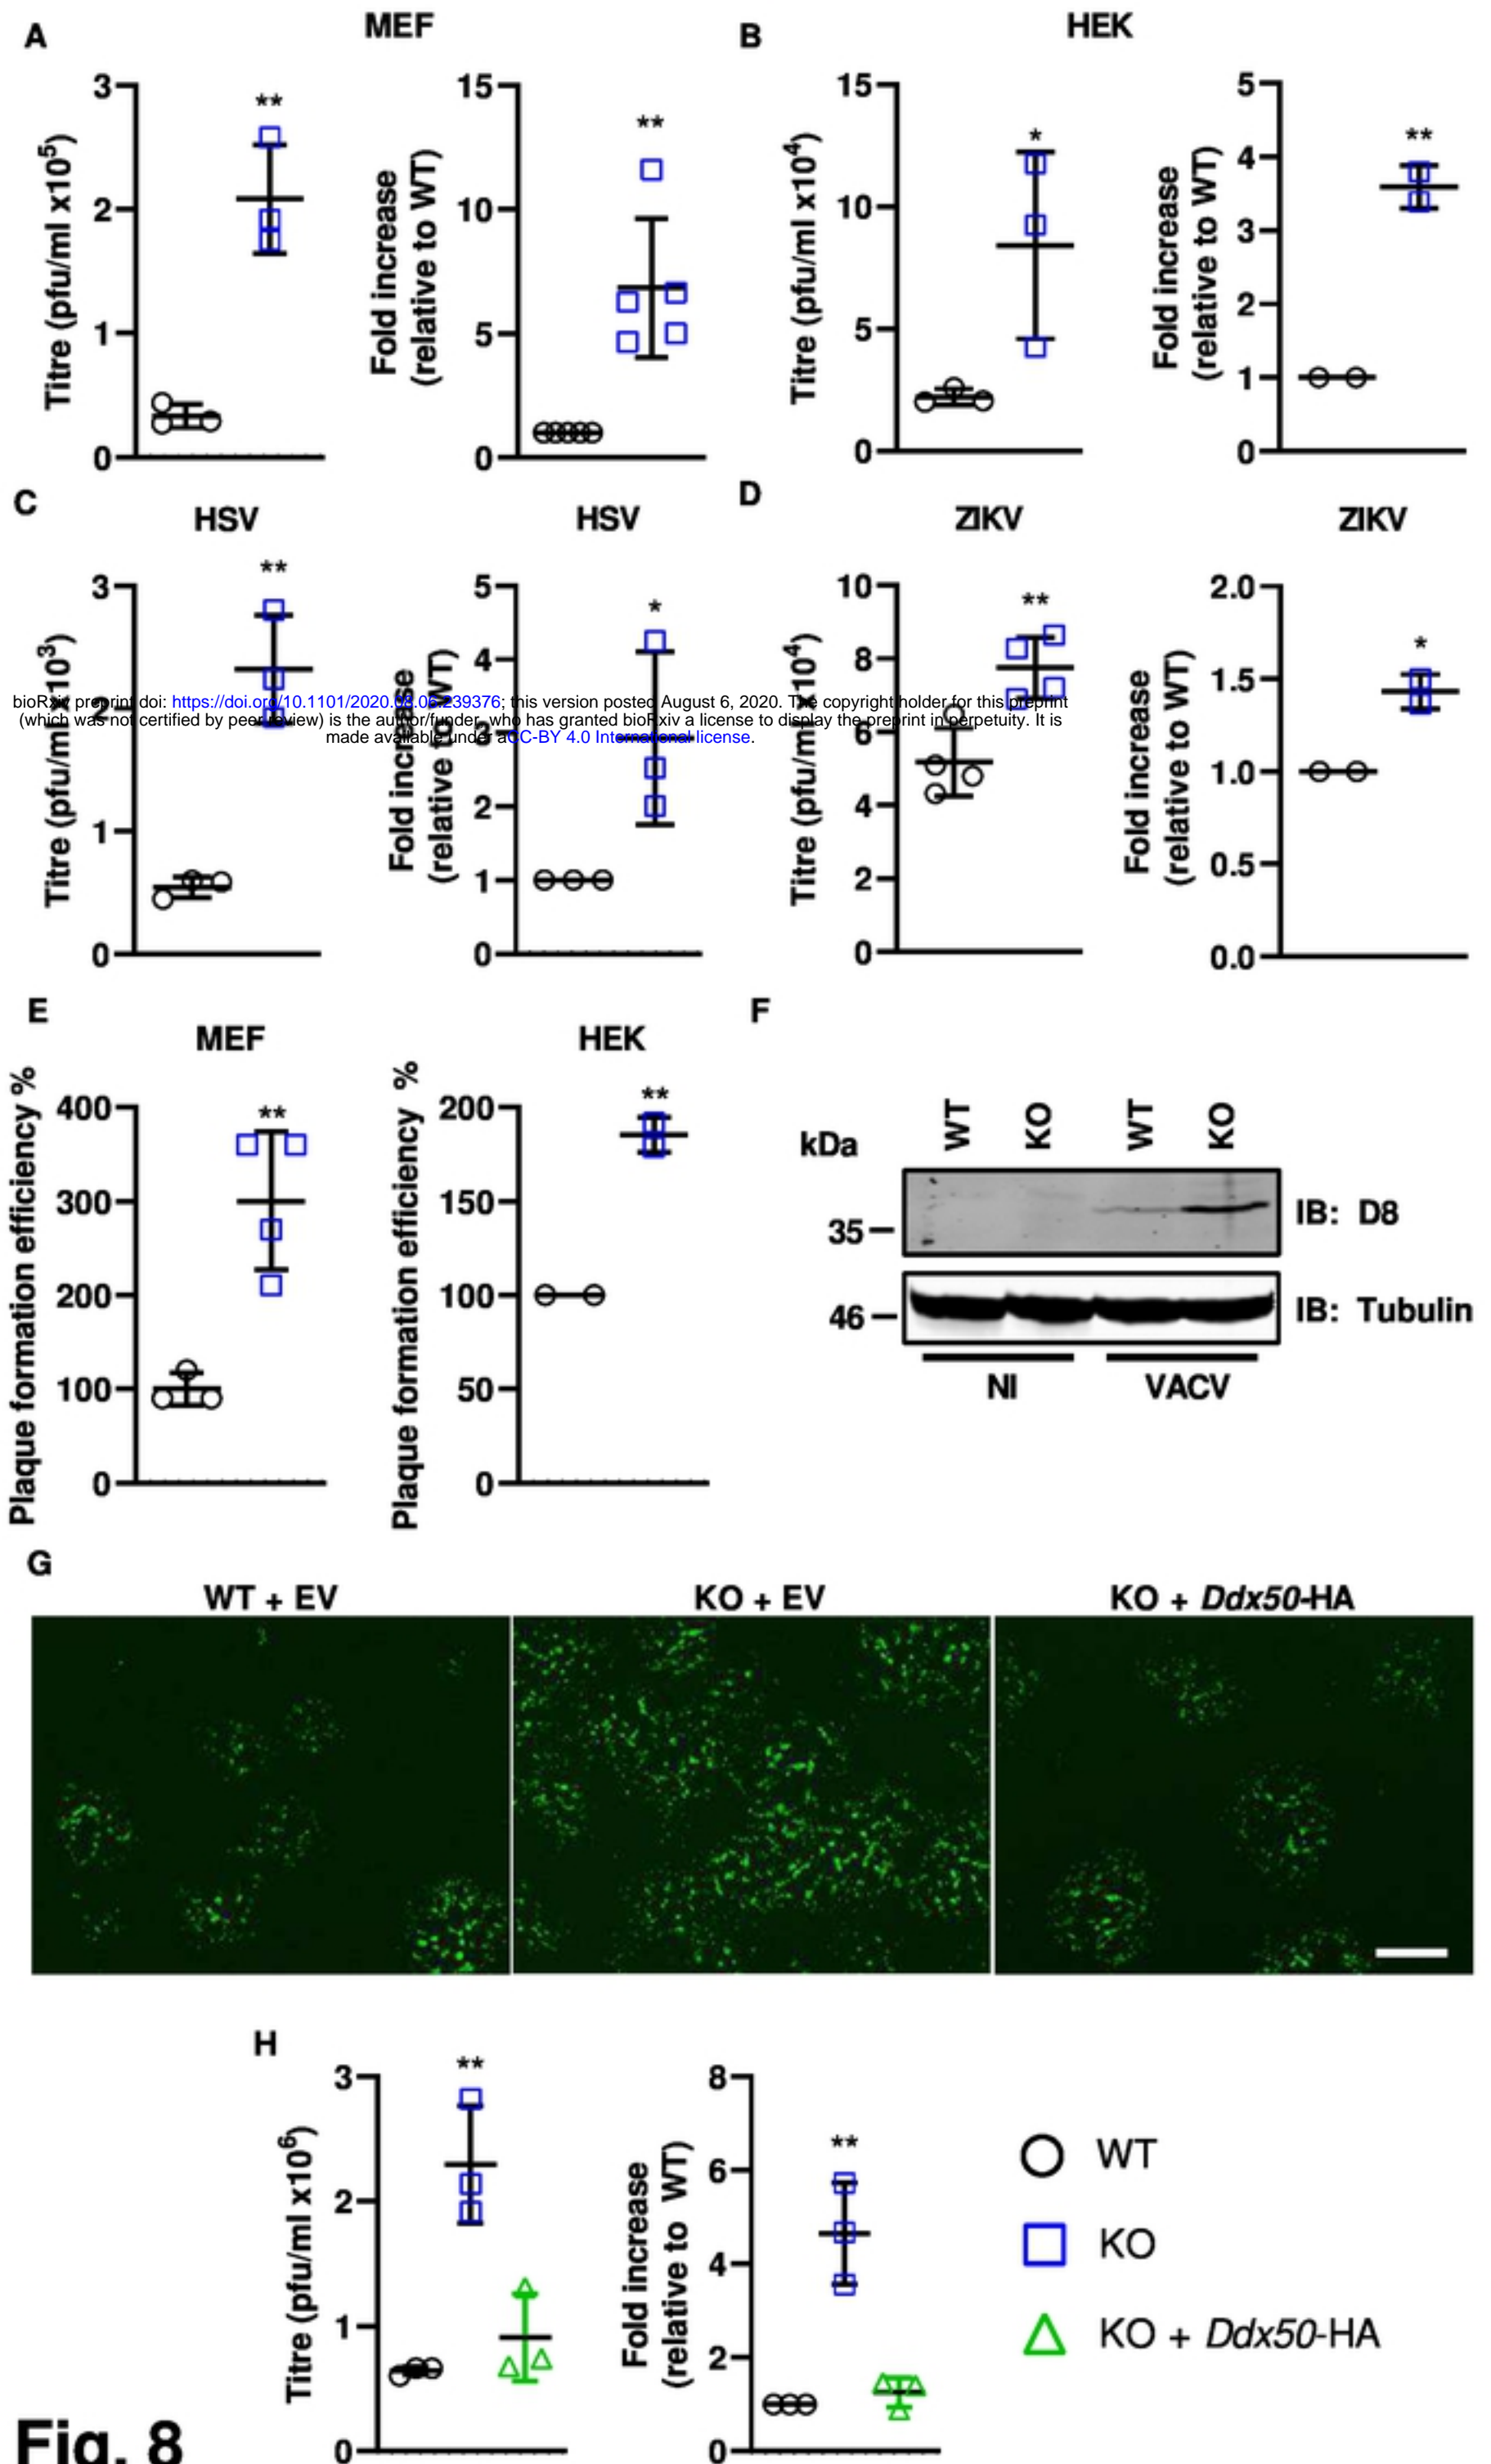

**Fig. 8**
